# Supplementary material for: Access to Anti-Biofilm Compounds from Endolichenic Fungi Using a Bioguided Networking Screening
Source: MDPI journal article supplement (doi:10.3390/jof8101012), 2022-09-27

## **SUPPLEMENTARY INFORMATION**

### **Access to anti-biofilm compounds from endolichenic fungi using a bioguided networking screening.**

Seinde Toure<sup>a</sup>, Marion Millot<sup>a\*</sup>, Lucie Ory<sup>b</sup>, Catherine Roulier<sup>b</sup>, Zineb Khaldi<sup>a</sup>, Valentin Pichon<sup>a</sup>, Marion Girardot<sup>c</sup>, Christine Imbert<sup>c</sup>, Lengo Mambu<sup>a</sup>

<sup>a</sup> Univ. Limoges, Laboratoire PEIRENE, UR 22722, F-87000 Limoges, France

<sup>b</sup> Nantes Université, Institut des Substances et Organismes de la Mer (ISOMer), UR 2160, F-44000, Nantes, France

<sup>c</sup> Univ. Poitiers, Laboratoire Ecologie et Biologie des Interactions (EBI), UMR CNRS 7267, F-86000, Poitiers, France

Table S1. Fungal strains description

| Species                           | Class           | Order          | Family          | Accession number | Lichen source                  |
|-----------------------------------|-----------------|----------------|-----------------|------------------|--------------------------------|
| <i>Anthostomella pinea</i>        | Sordariomycetes | Xylariales     | Xylariaceae     | MG543933         | <i>Evernia prunastri</i>       |
| <i>Biscogniauxia nummularia</i>   | Sordariomycetes | Xylariales     | Xylariaceae     | MG543960         | <i>Ramalina fastigiata</i>     |
| <i>Biscogniauxia nummularia</i>   | Sordariomycetes | Xylariales     | Xylariaceae     | MG543965         | <i>Ramalina fastigiata</i>     |
| <i>Biscogniauxia mediterranea</i> | Sordariomycetes | Xylariales     | Xylariaceae     | MG543959         | <i>Ramalina fastigiata</i>     |
| <i>Biscogniauxia mediterranea</i> | Sordariomycetes | Xylariales     | Xylariaceae     | MG543963         | <i>Ramalina fastigiata</i>     |
| <i>Coniochaeta hoffmannii</i>     | Sordariomycetes | Coniochaetales | Coniochaetaceae | MG543962         | <i>Ramalina fastigiata</i>     |
| <i>Coniochaeta lignicola</i>      | Sordariomycetes | Coniochaetales | Coniochaetaceae | MG543934         | <i>Ramalina fastigiata</i>     |
| <i>Coniochaeta decumbens</i>      | Sordariomycetes | Coniochaetales | Coniochaetaceae | MG543958         | <i>Ramalina fastigiata</i>     |
| <i>Fusarium avenaceum</i>         | Sordariomycetes | Hypocreales    | Nectriaceae     | MG543945         | <i>Pleurosticta acetabulum</i> |
| <i>Peziza varia</i>               | Pezizomycetes   | Pezizales      | Pezizaceae      | MG917006         | <i>Nephroma laevigatum</i>     |
| <i>Plectania melastoma</i>        | Pezizomycetes   | Pezizales      | Sarcosomataceae | MG543948         | <i>Pleurosticta acetabulum</i> |
| <i>Preussia persica</i>           | Dothideomycetes | Pleosporales   | Sporormiaceae   | MG543927         | <i>Evernia prunastri</i>       |
| <i>Preussia persica</i>           | Dothideomycetes | Pleosporales   | Sporormiaceae   | MG543964         | <i>Ramalina fastigiata</i>     |
| <i>Sordaria fimicola</i>          | Sordariomycetes | Sordariales    | Sordariaceae    | MG543930         | <i>Evernia prunastri</i>       |

Table S2. Endolichenic fungi culture

| Identification                                  | Code | PDA                                                                                 | SAB                                                                                  | MEA                                                                                   | Comments                                    |
|-------------------------------------------------|------|-------------------------------------------------------------------------------------|--------------------------------------------------------------------------------------|---------------------------------------------------------------------------------------|---------------------------------------------|
| <i>Anthostomella pinea</i>                      | EP22 |    |                                                                                      |    | Growth very slow. Extraction after xx weeks |
| <i>Biscogniauxia nummularia</i><br>Genotype 1   | RF09 |    |    |    |                                             |
| <i>Biscogniauxia nummularia</i><br>Genotype 2   | RF11 |    |    |                                                                                       |                                             |
| <i>Biscogniauxia mediterranea</i><br>Genotype 1 | RF13 |                                                                                     |    |                                                                                       |                                             |
| <i>Coniochaeta hoffmannii</i>                   | RF20 |    |    |    |                                             |
| <i>Biscogniauxia mediterranea</i><br>Genotype 2 | RF26 |                                                                                     |   |                                                                                       |                                             |
| <i>Coniochaeta decumbens</i>                    | RF31 |  |  |                                                                                       |                                             |
| <i>Coniochaeta lignicola</i>                    | EP25 |  |  |  |                                             |
| <i>Fusarium avenaceum</i>                       | PA25 |  |  |  |                                             |

|                              |       |                                                                                   |                                                                                    |                                                                                     |                                            |
|------------------------------|-------|-----------------------------------------------------------------------------------|------------------------------------------------------------------------------------|-------------------------------------------------------------------------------------|--------------------------------------------|
| <i>Plectania melastoma</i>   | PA39  |  |  |  |                                            |
| <i>Peziza varia</i>          | Gir02 |  |  |  | On MEA medium, color white-brown or rosish |
| <i>Sordaria fimicola</i> (1) | EP01  |  |  |  |                                            |
| <i>Preussia persica</i> (1)  | RF28  |                                                                                   |                                                                                    |  | No growth from cryotubes                   |
| <i>Preussia persica</i> (2)  | EP02  |  |                                                                                    |  |                                            |

**Figure S1.** Scatter plot presenting peak areas of highlighted feature  $m/z$  269.0448 at 12.8 min (emodin) in correlation with the activity of the corresponding extracts of *Coniochaeta* samples. Pearson correlation coefficient of the linear regression  $r^2$  is given.

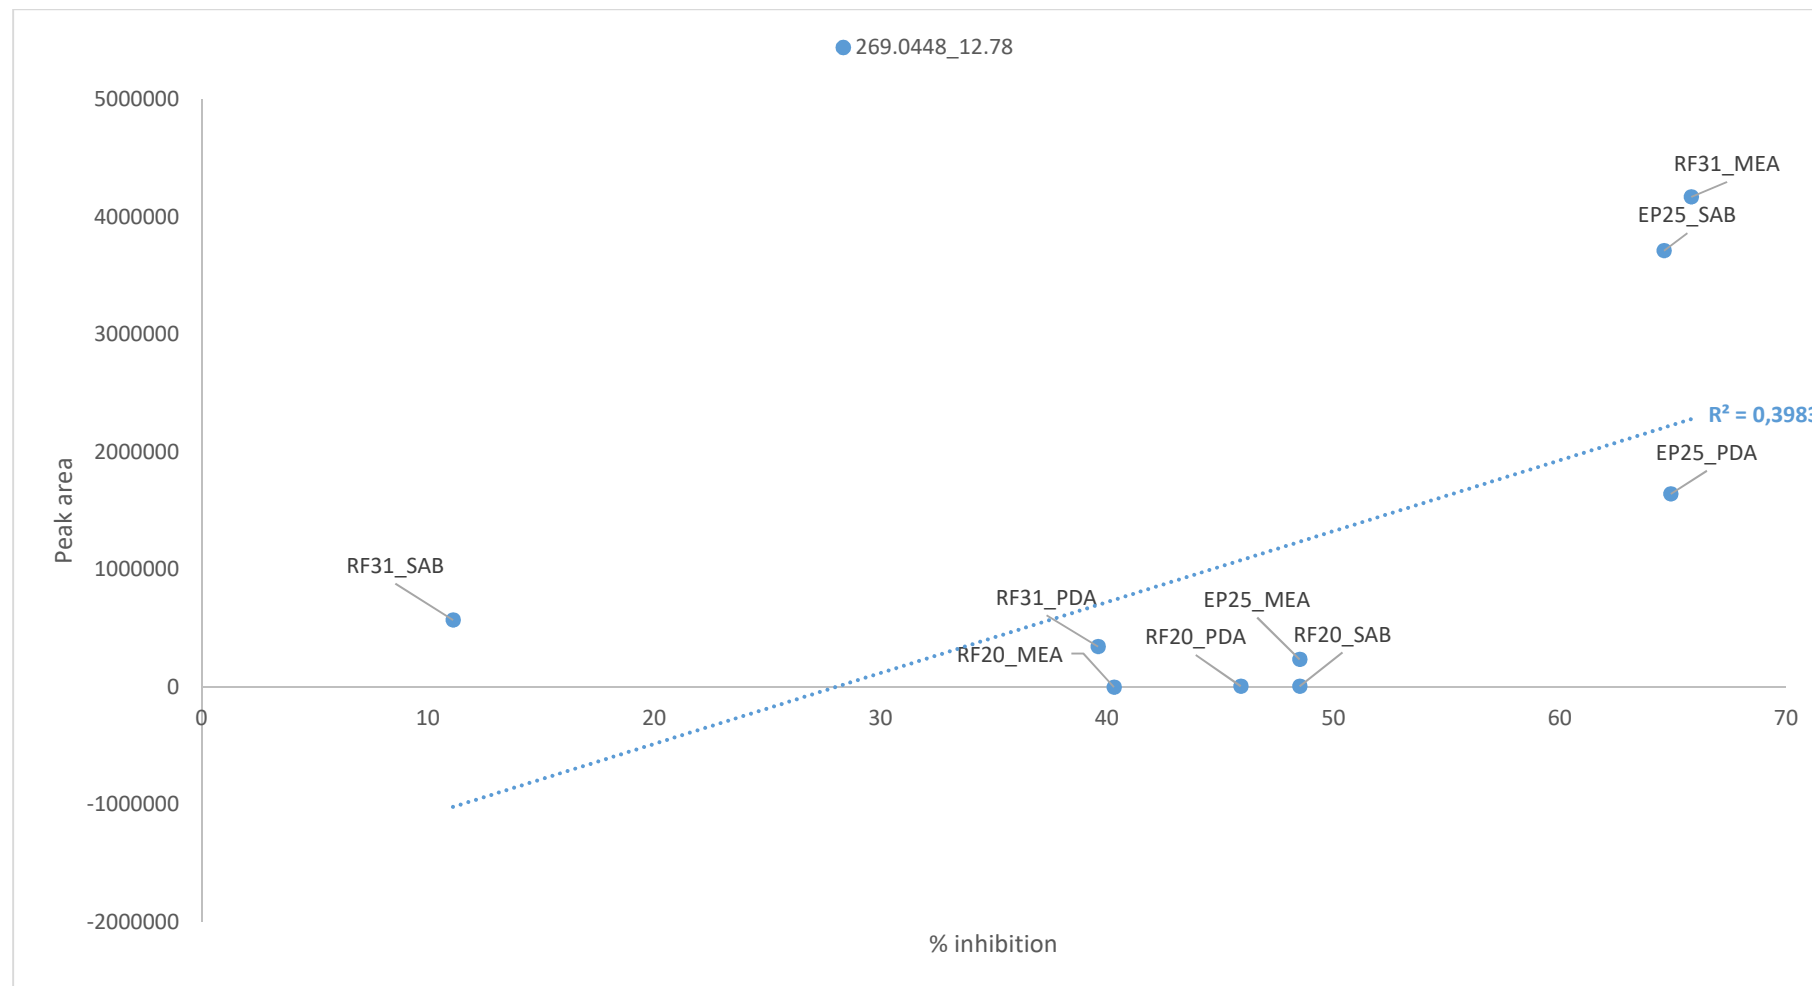

**Figure S2.** Scatter plot presenting peak areas of highlighted features  $m/z$  654.6044, 700.6101 and 768.5977 at 21.0 min in correlation with the activity of the corresponding extracts of *Coniochaeta* samples. Pearson correlation coefficient of the linear regression  $r^2$  is given.

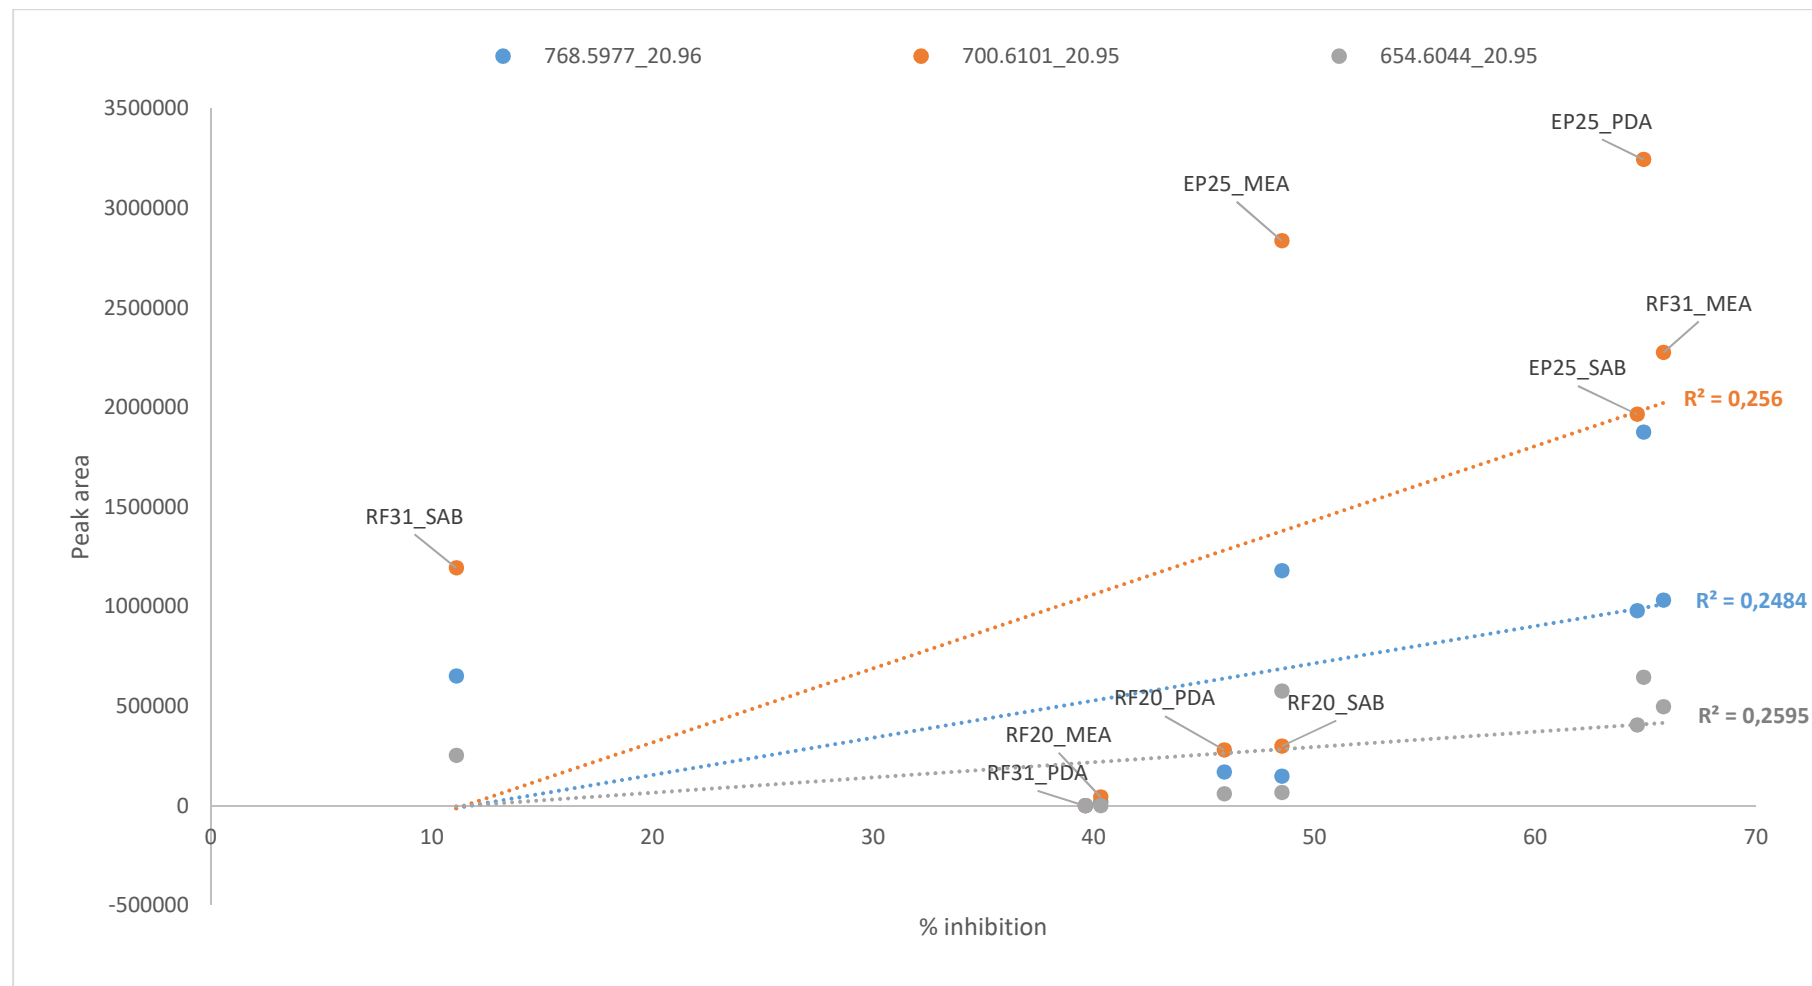

**Figure S3.** Scatter plot presenting peak areas of highlighted feature  $m/z$  298.2116 at 14.1 min in correlation with the activity of the corresponding extracts of *Coniochaeta* samples. Pearson correlation coefficient of the linear regression  $r^2$  is given.

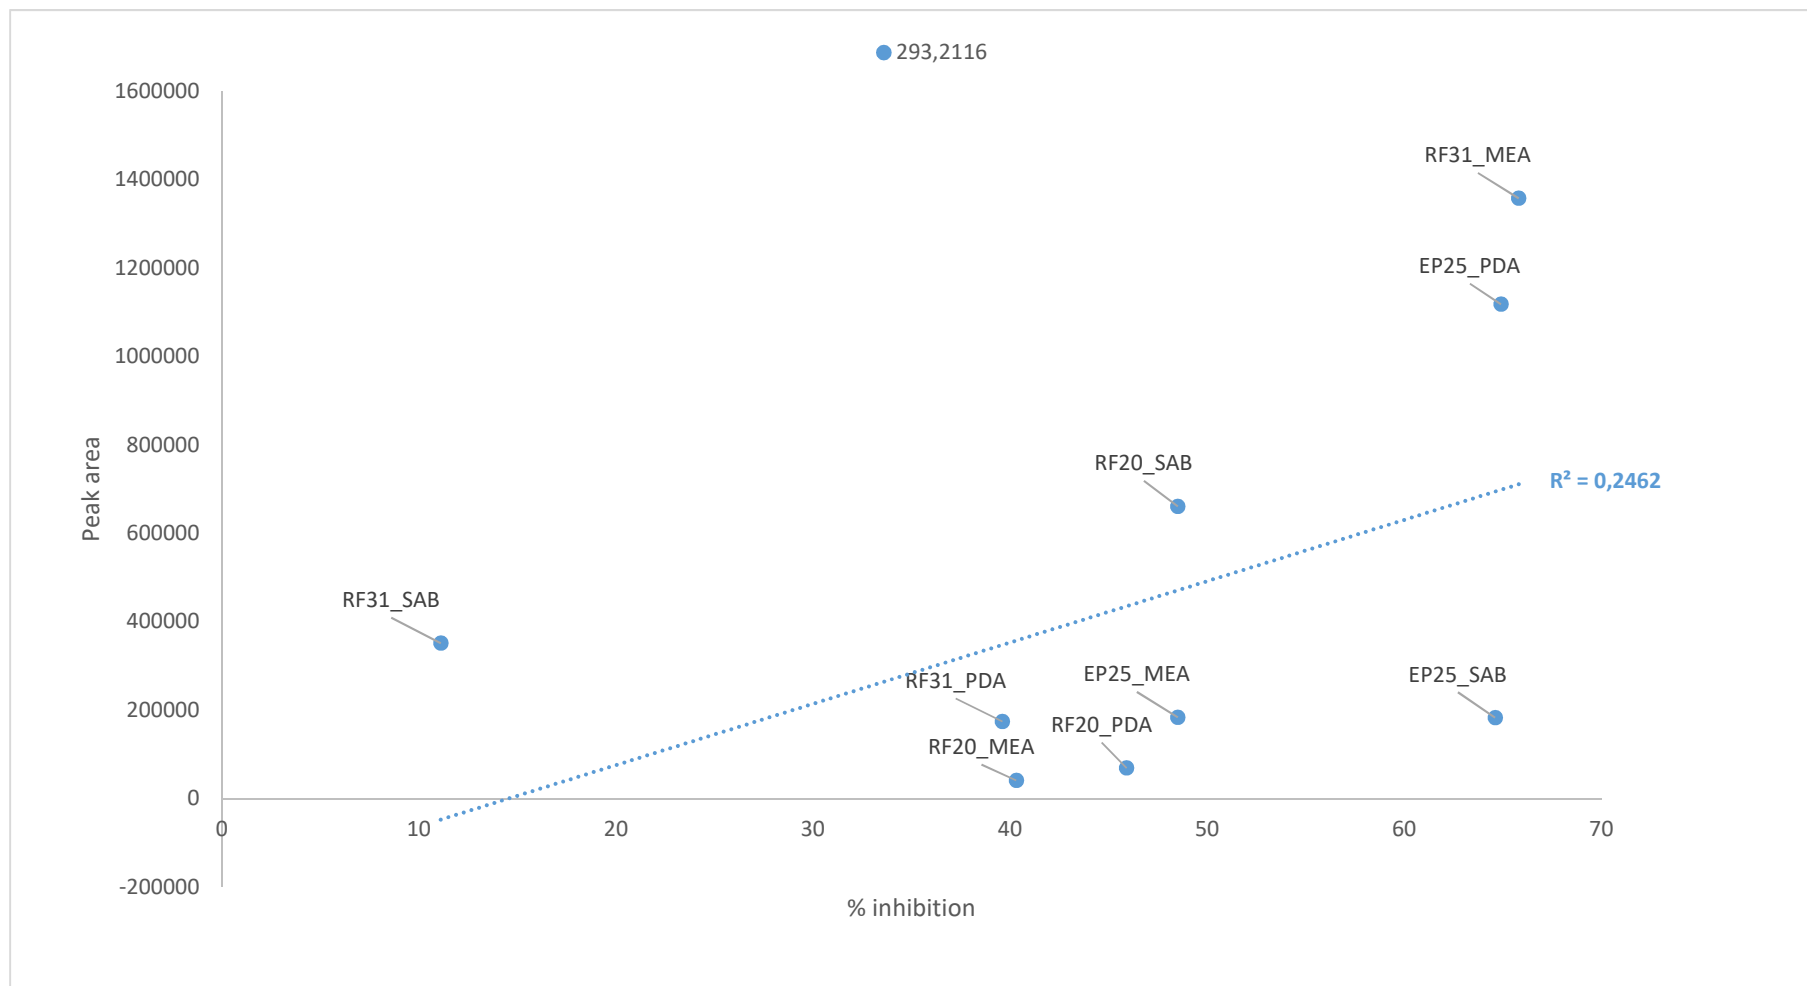

**Figure S4.** Scatter plot presenting peak areas of highlighted feature  $m/z$  541.1126 at 12.7 min (emodin) in correlation with the activity of the corresponding extracts of *Coniochaeta* samples. Pearson correlation coefficient of the linear regression  $r^2$  is given.

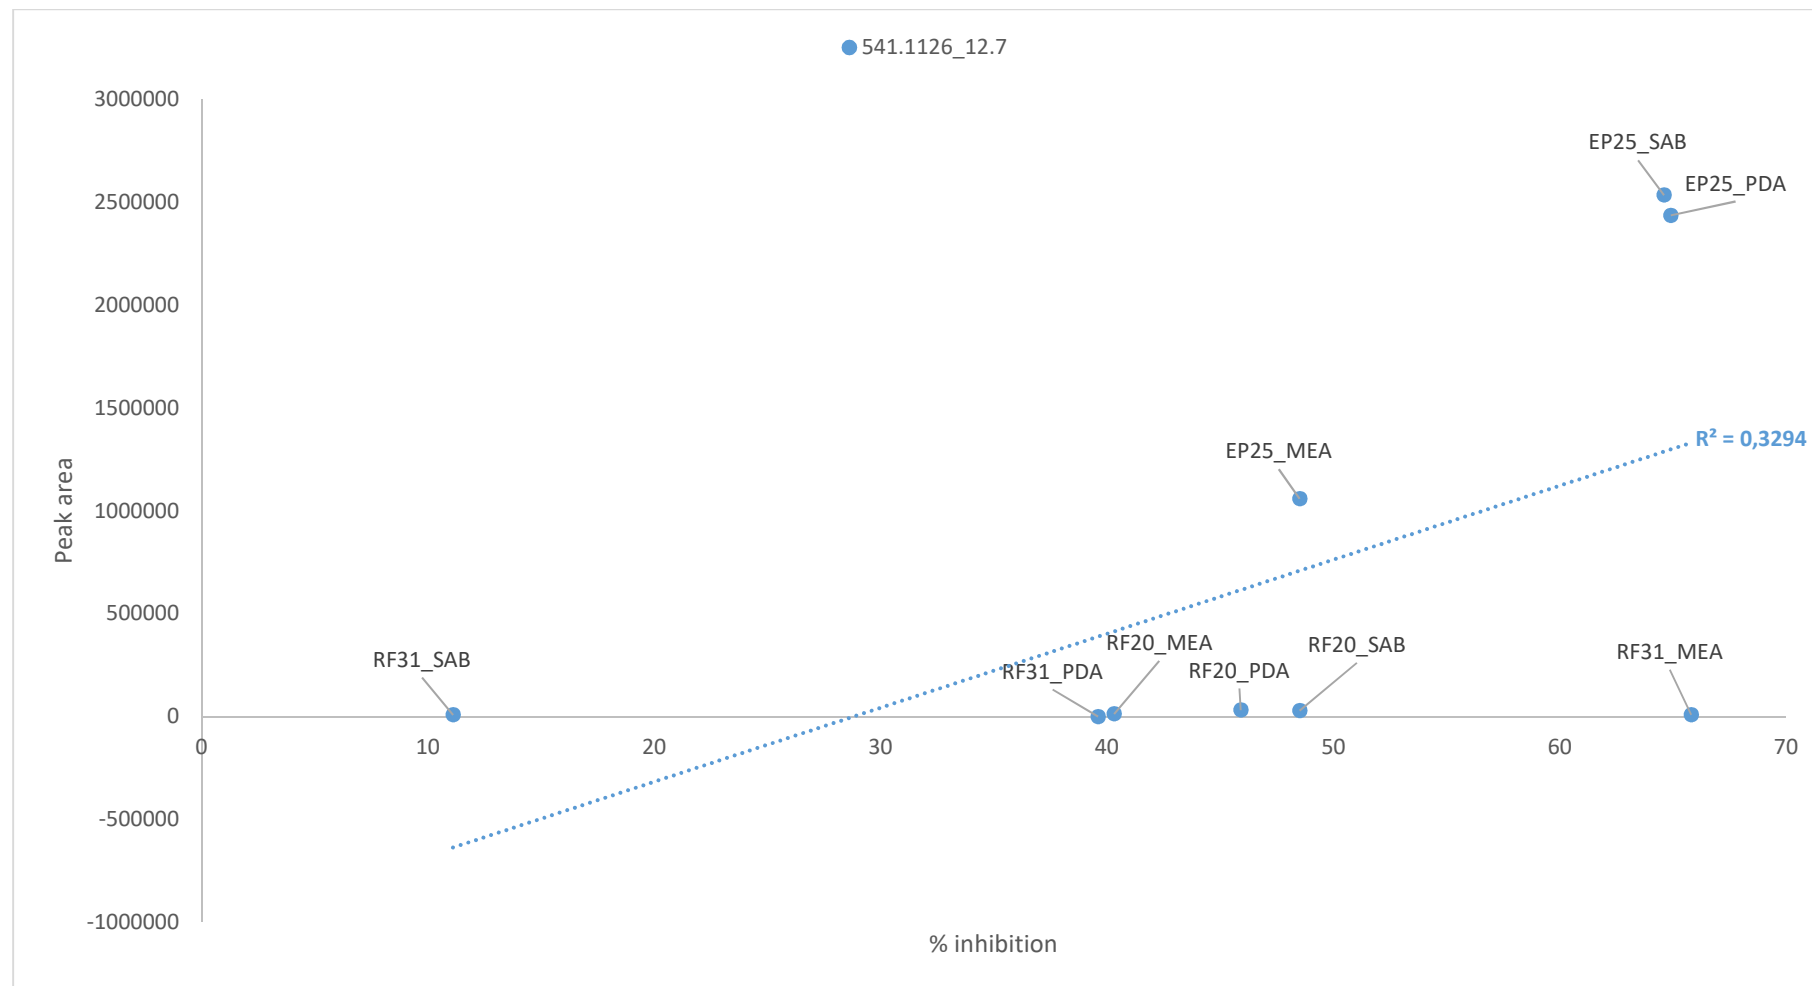



**Figure S5.** Scatter plot presenting peak areas of highlighted features  $m/z$  584.3807, 620.3573 and 630.3862 at 13.5 min in correlation with the activity of the corresponding extracts of *Biscogniauxia* samples. Pearson correlation coefficient of the linear regression  $r^2$  is given.

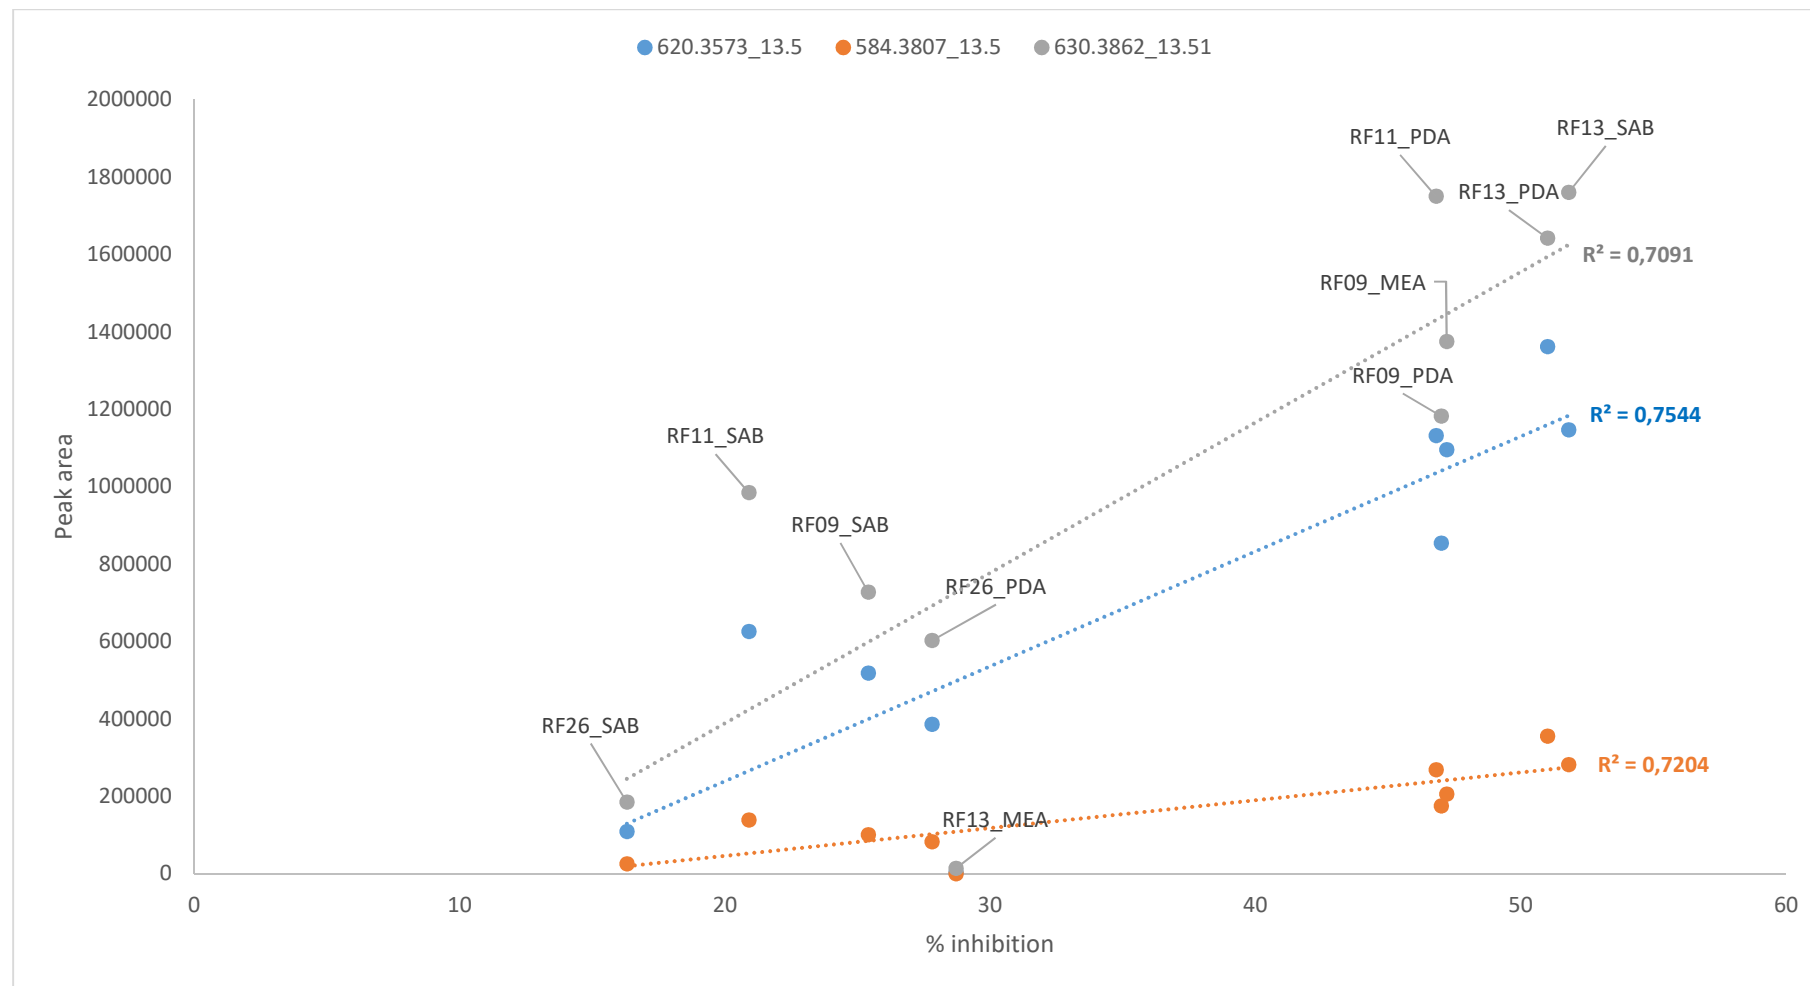

**Figure S6.** Scatter plot presenting peak areas of highlighted features  $m/z$  598.3965, 634.3732 and 644.4020 at 13.8 min in correlation with the activity of the corresponding extracts of *Biscogniauxia* samples. Pearson correlation coefficient of the linear regression  $r^2$  is given.

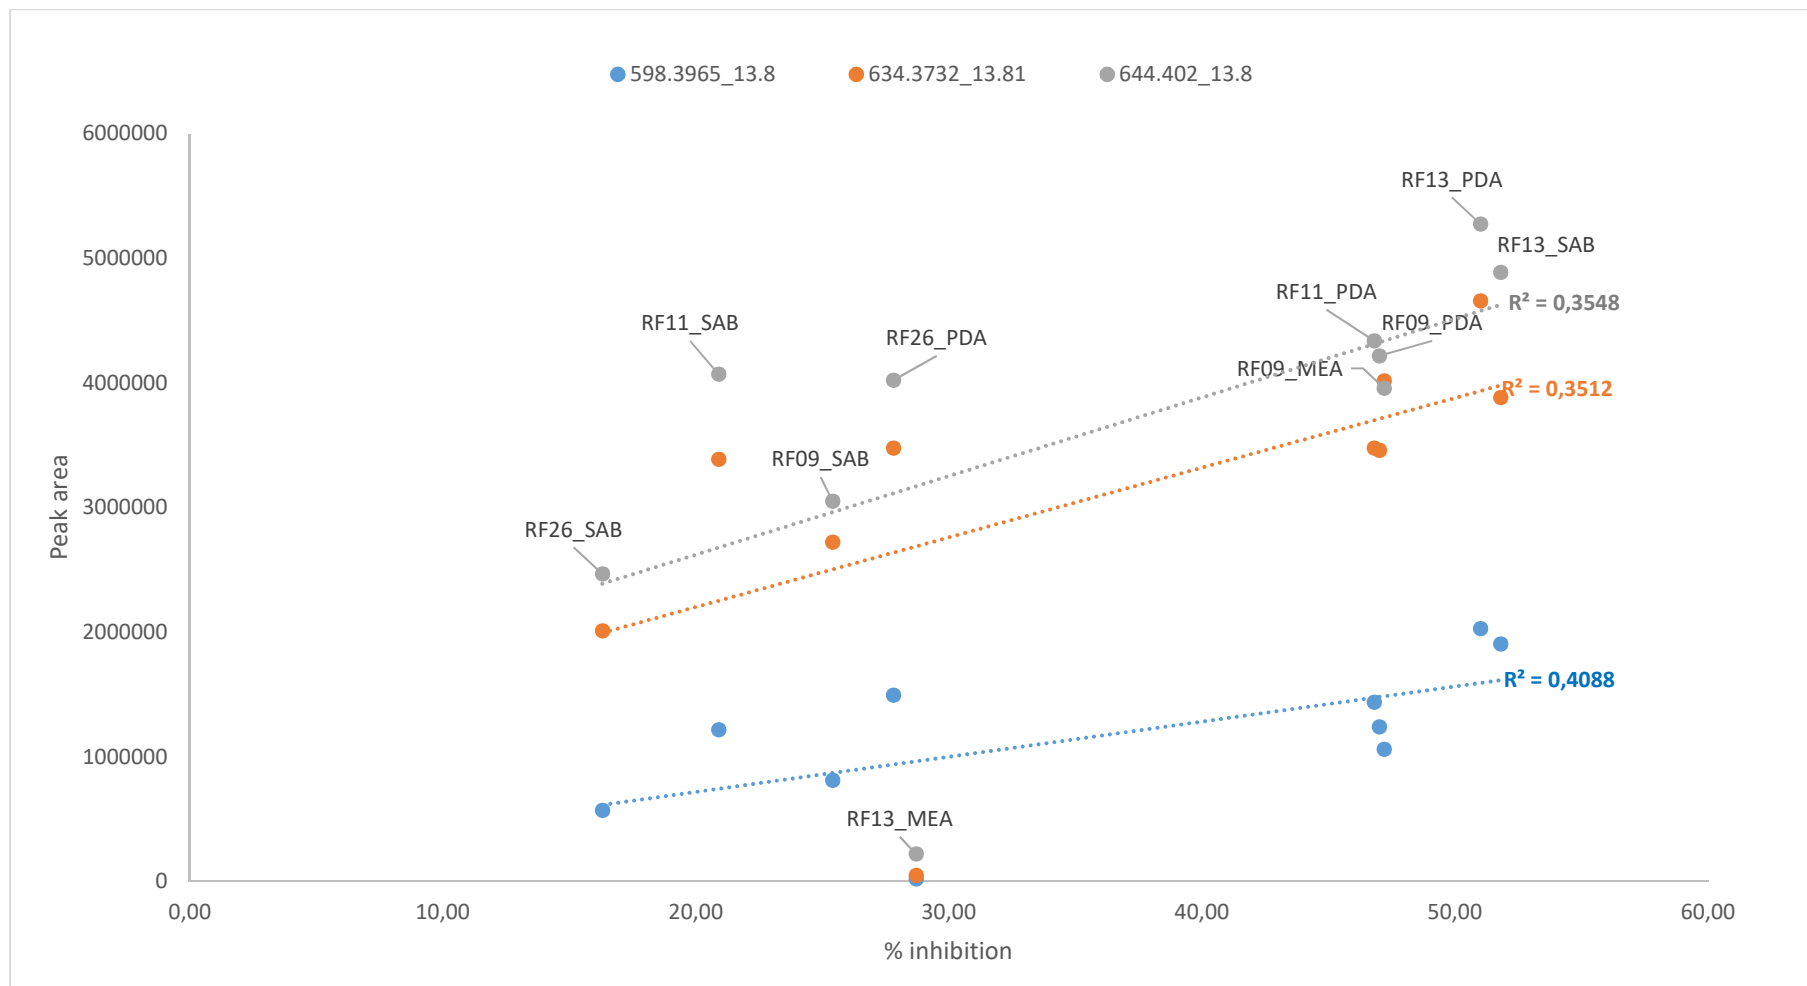

**Figure S7.** Scatter plot presenting peak areas of highlighted feature  $m/z$  269.2119 at 14.9 min in correlation with the activity of the corresponding extracts of *Biscogniauxia* samples. Pearson correlation coefficient of the linear regression  $r^2$  is given.

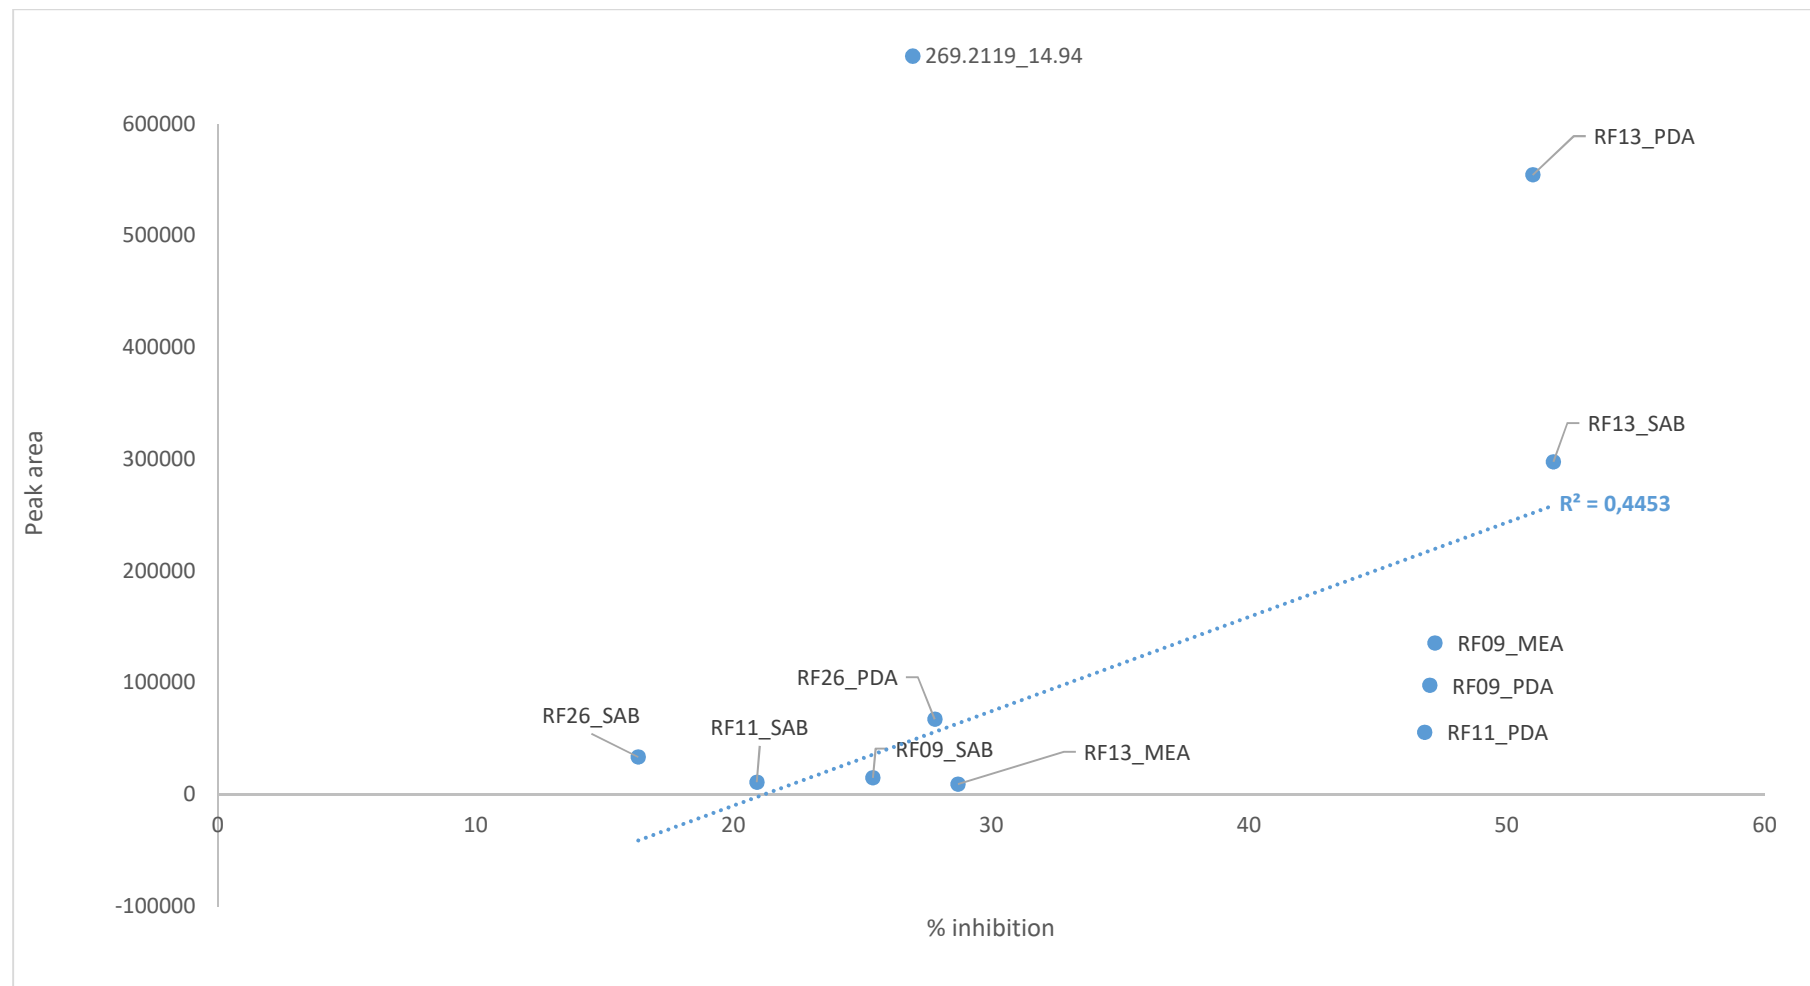

Figure S8. Scatter plot presenting peak areas of highlighted feature  $m/z$  295.2271 at 13.7 min in correlation with the activity of the corresponding extracts of *Preussia* samples. Pearson correlation coefficient of the linear regression  $r^2$  is given.

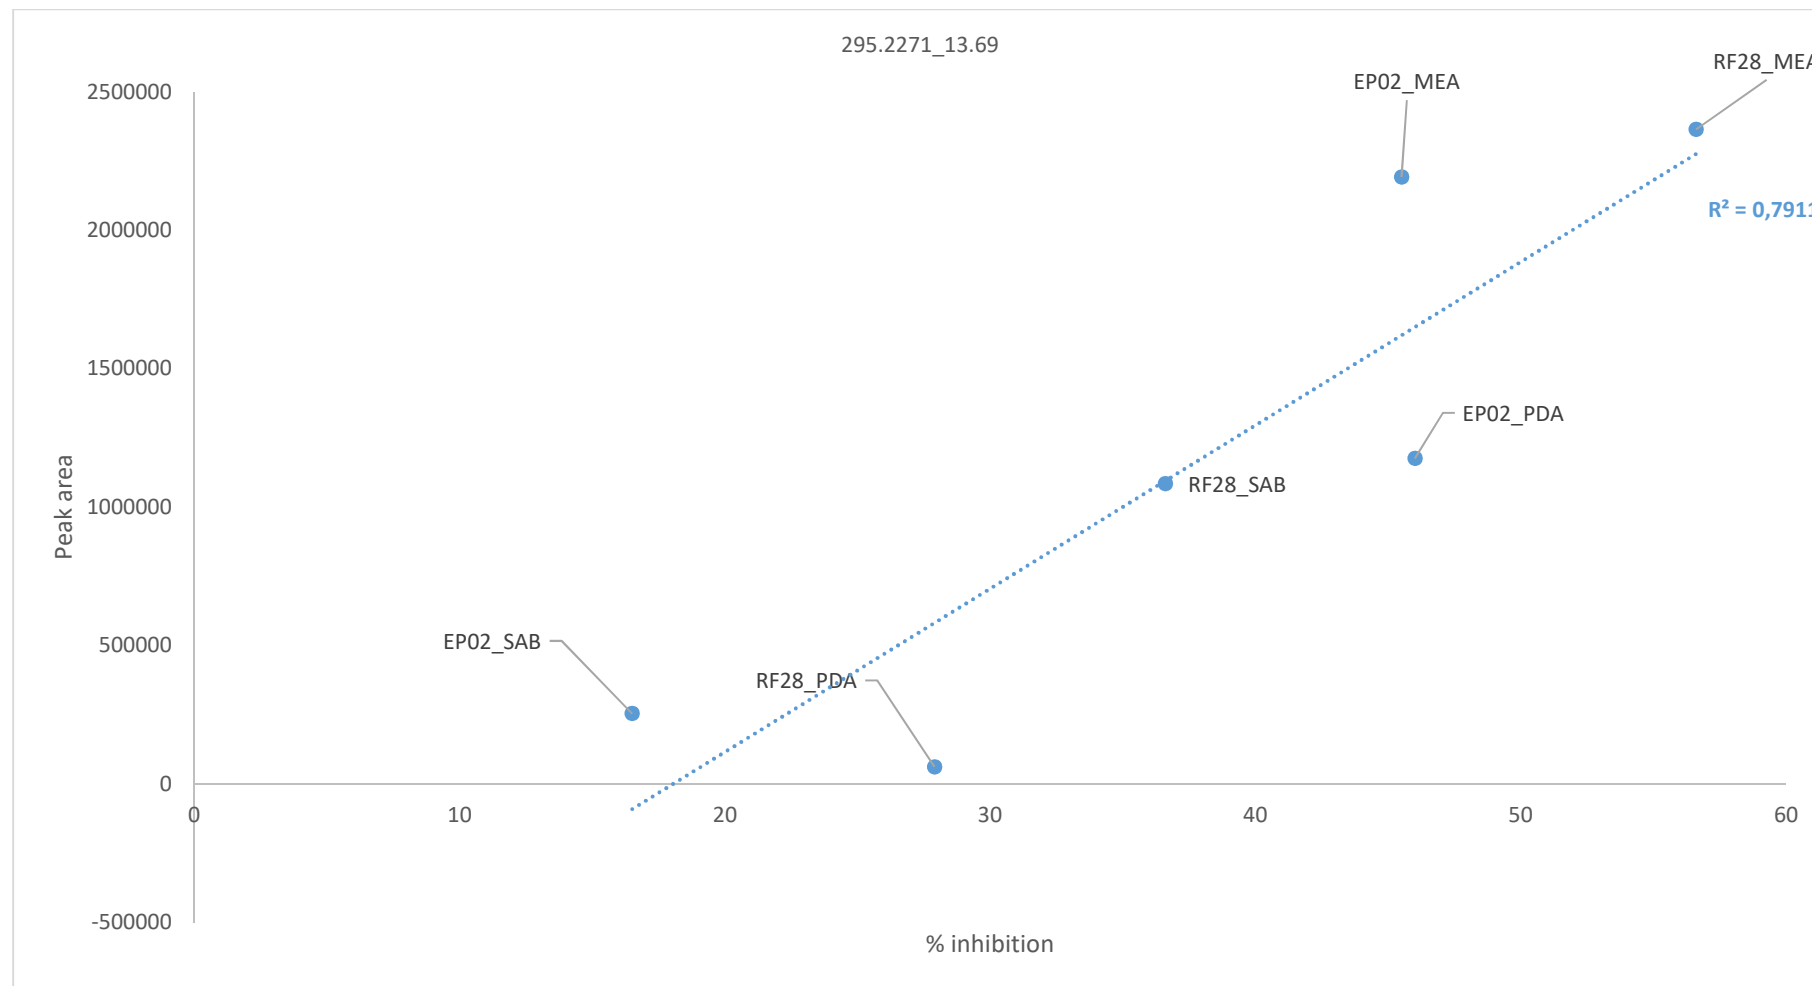

**Figure S9.** Scatter plot presenting peak areas of highlighted feature  $m/z$  311.2219 at 13.0 min in correlation with the activity of the corresponding extracts of *Preussia* samples. Pearson correlation coefficient of the linear regression  $r^2$  is given.

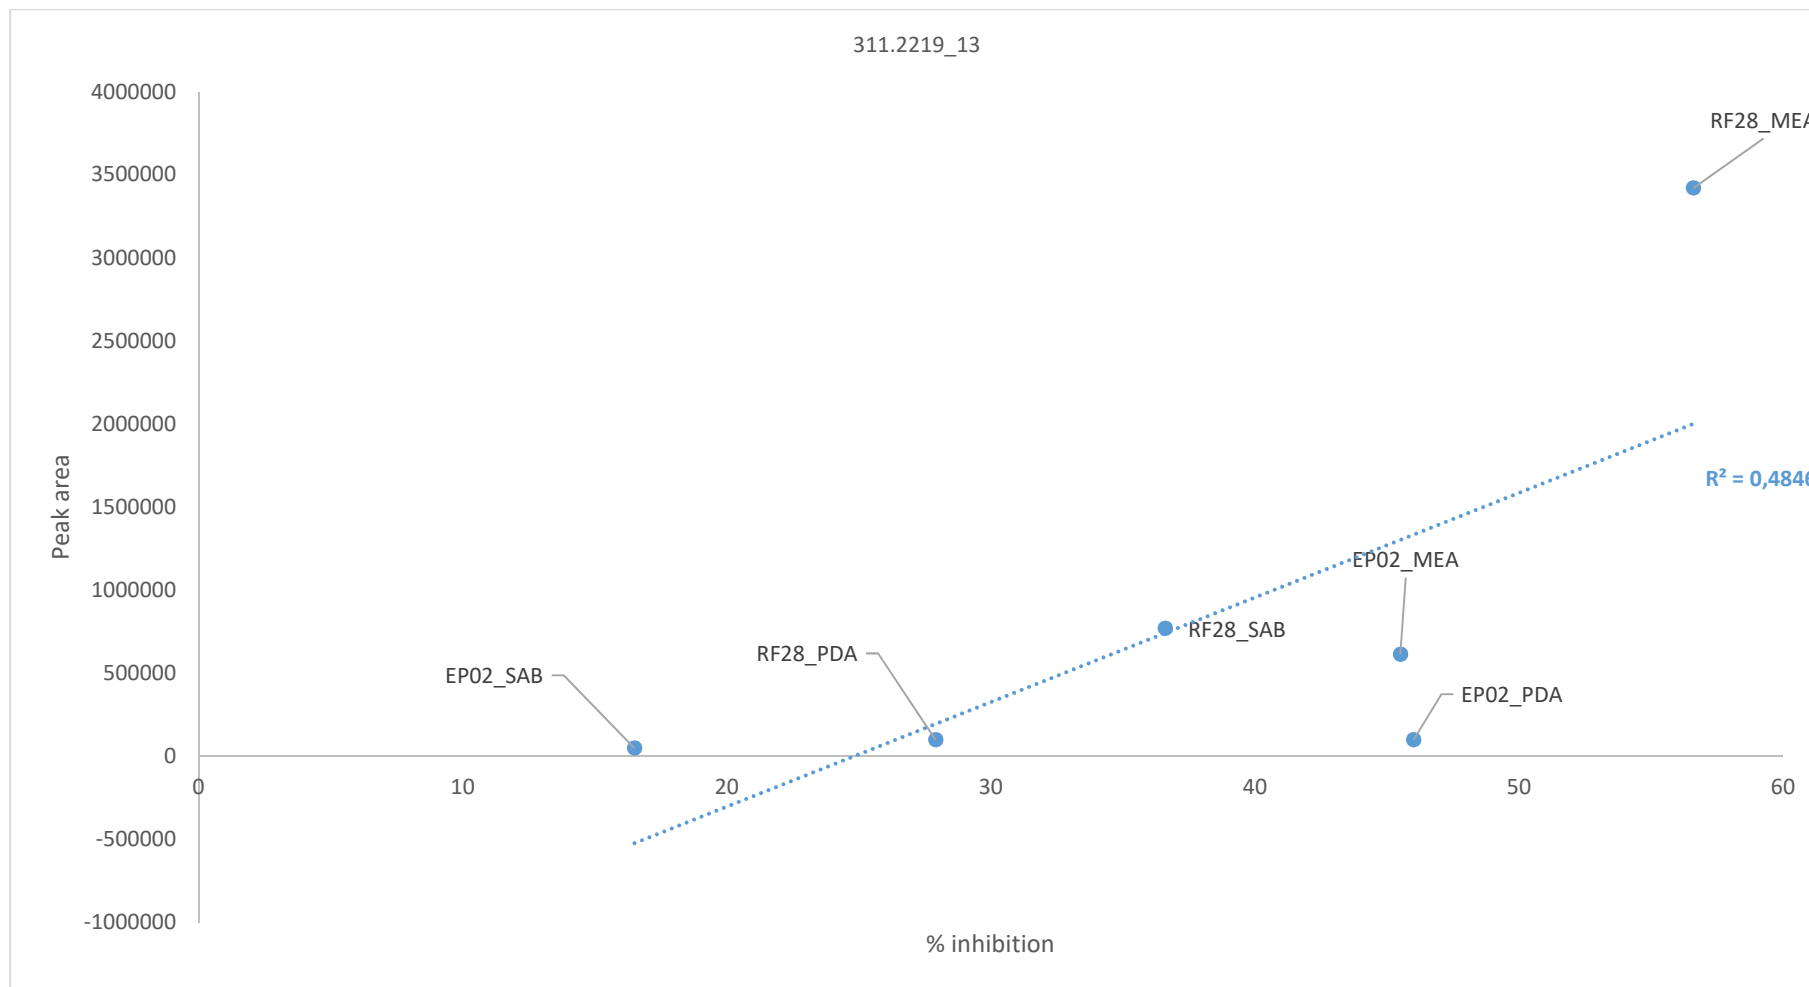

Figure S10. Scatter plot presenting peak areas of highlighted feature  $m/z$  589.4468 at 16.2 min in correlation with the activity of the corresponding extracts of *Preussia* samples. Pearson correlation coefficient of the linear regression  $r^2$  is given.

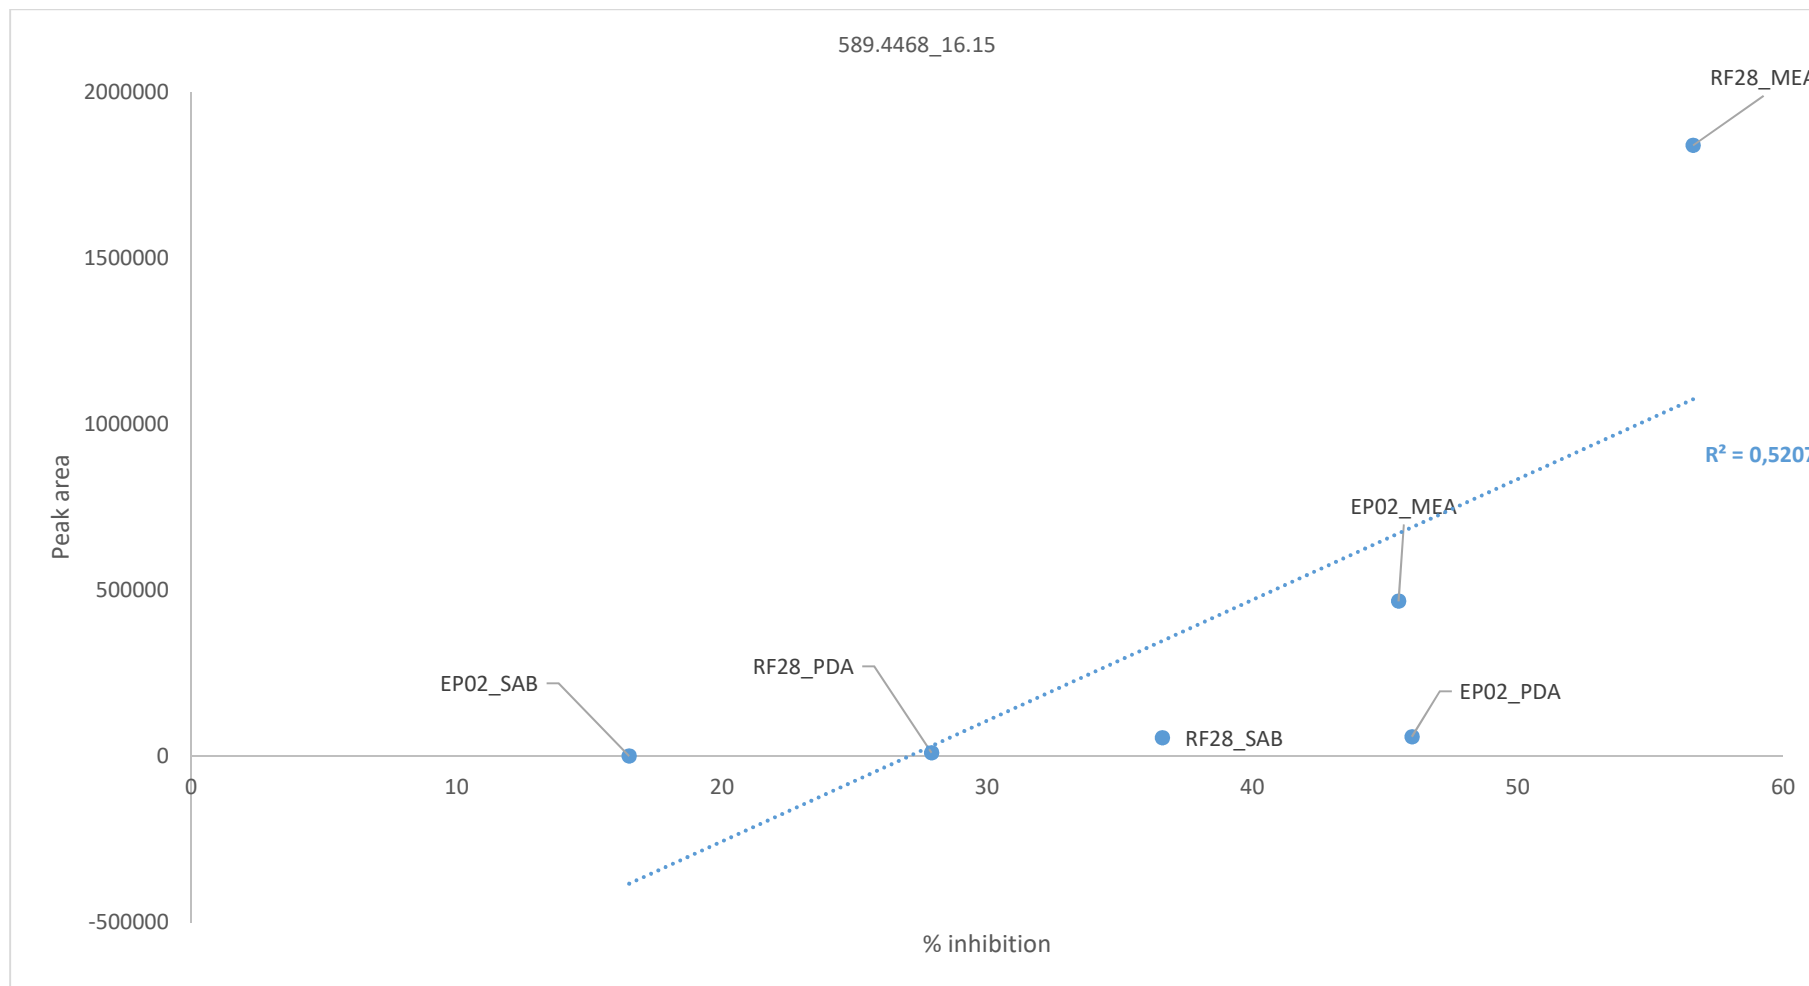

Figure S11. Scatter plot presenting peak areas of highlighted feature  $m/z$  309.2066 at 12.1 min in correlation with the activity of the corresponding extracts of *Preussia* samples. Pearson correlation coefficient of the linear regression  $r^2$  is given.

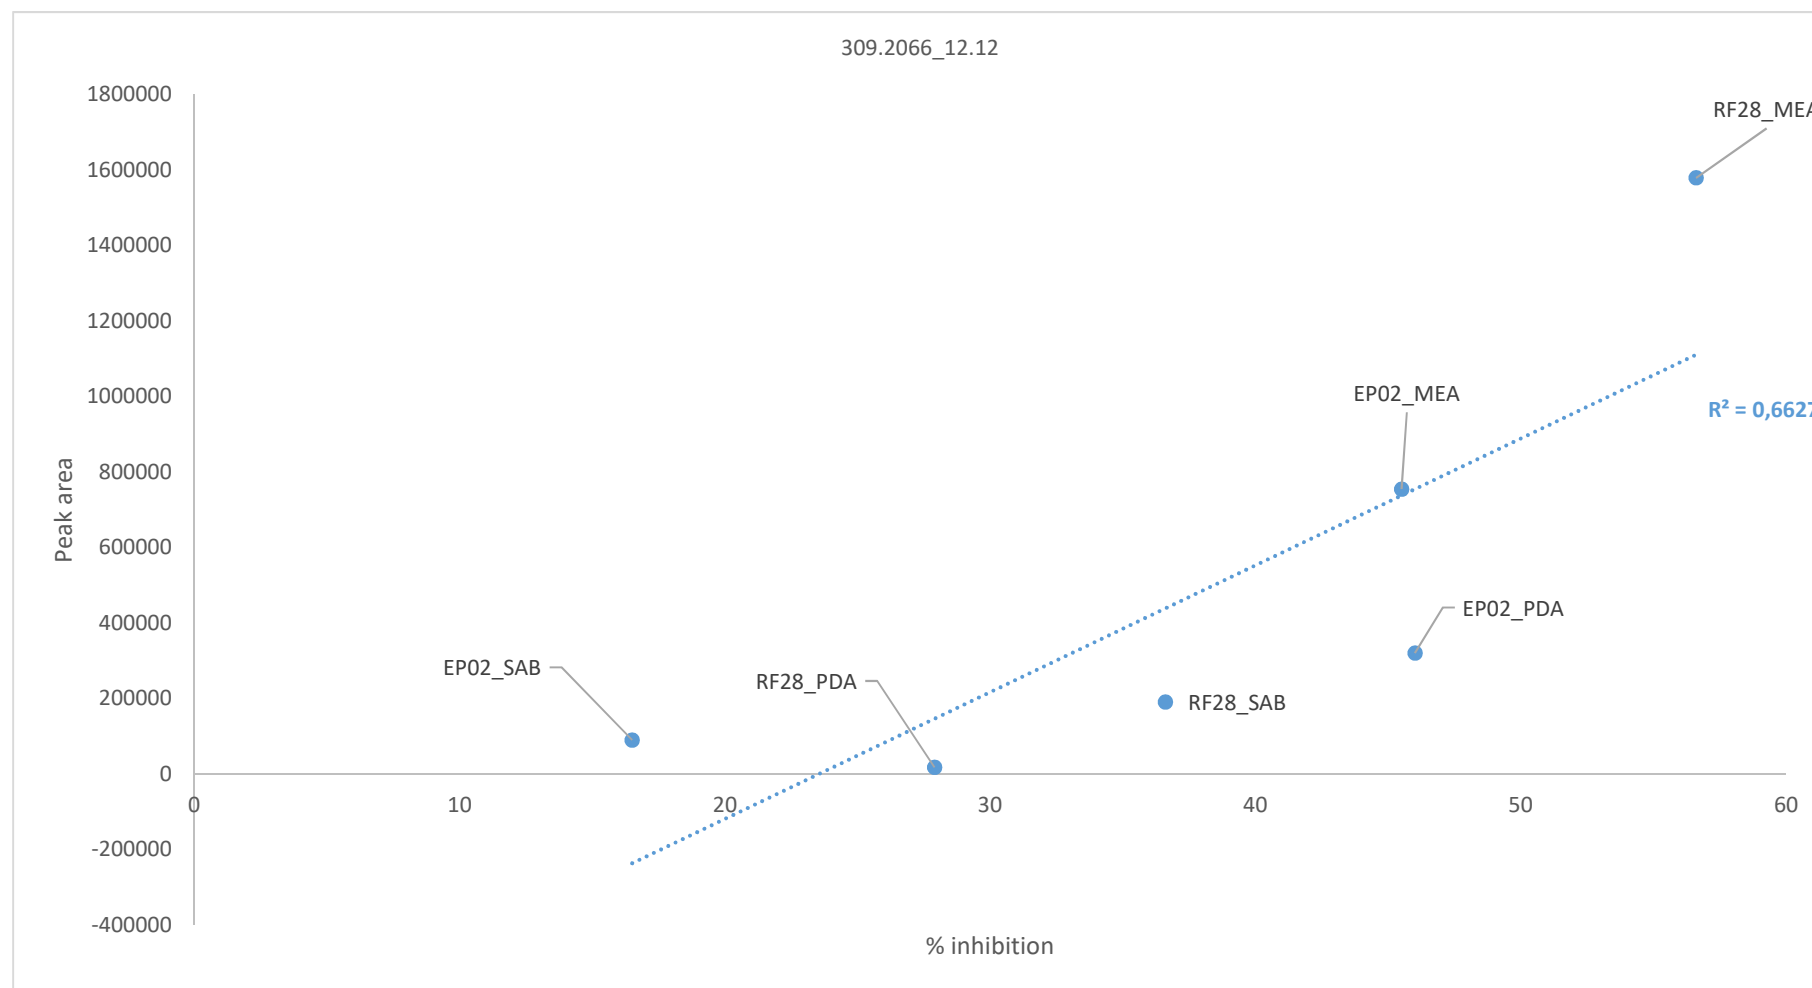

**Figure S12.** Scatter plot presenting peak areas of highlighted feature  $m/z$  311.222 at 12.8 min in correlation with the activity of the corresponding extracts of *Preussia* samples. Pearson correlation coefficient of the linear regression  $r^2$  is given.

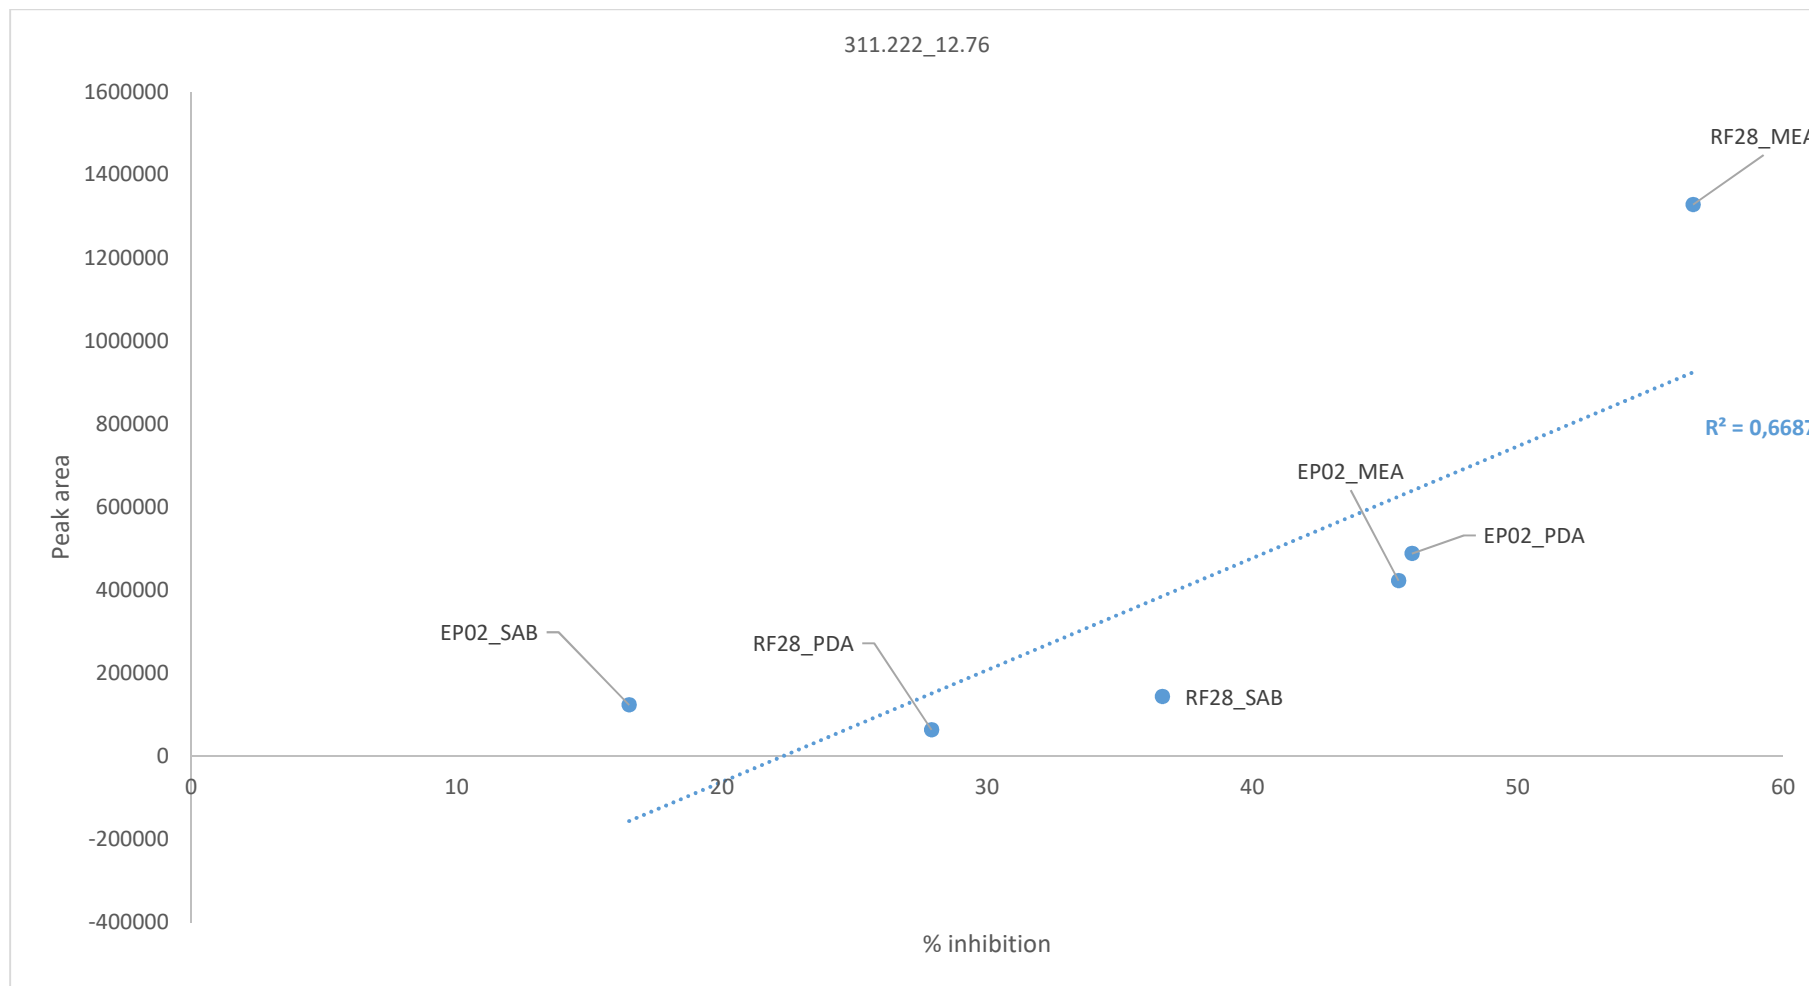



**Figure S13.** Scatter plot presenting peak areas of highlighted feature  $m/z$  311.2222 at 12.0 min in correlation with the activity of the corresponding extracts of *Preussia* samples. Pearson correlation coefficient of the linear regression  $r^2$  is given.

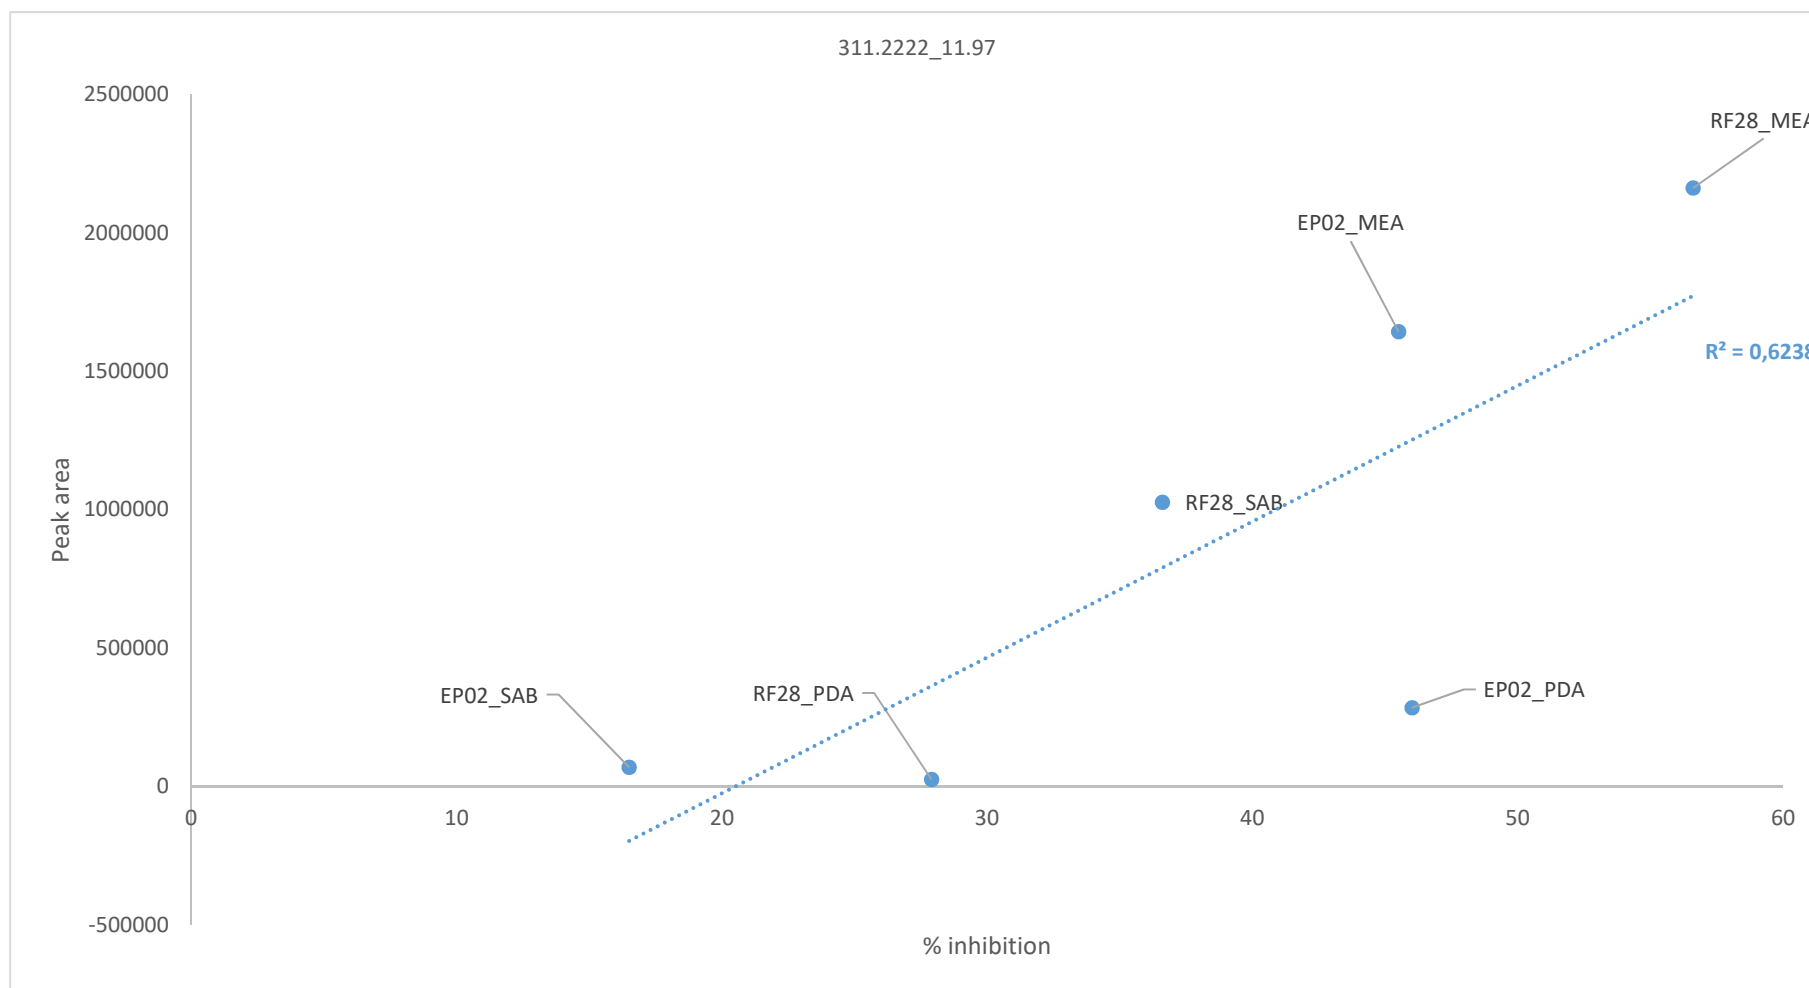

**Figure S14.** Scatter plot presenting peak areas of highlighted feature  $m/z$  295.2274 at 14.6 min in correlation with the activity of the corresponding extracts of *Preussia* samples. Pearson correlation coefficient of the linear regression  $r^2$  is given.

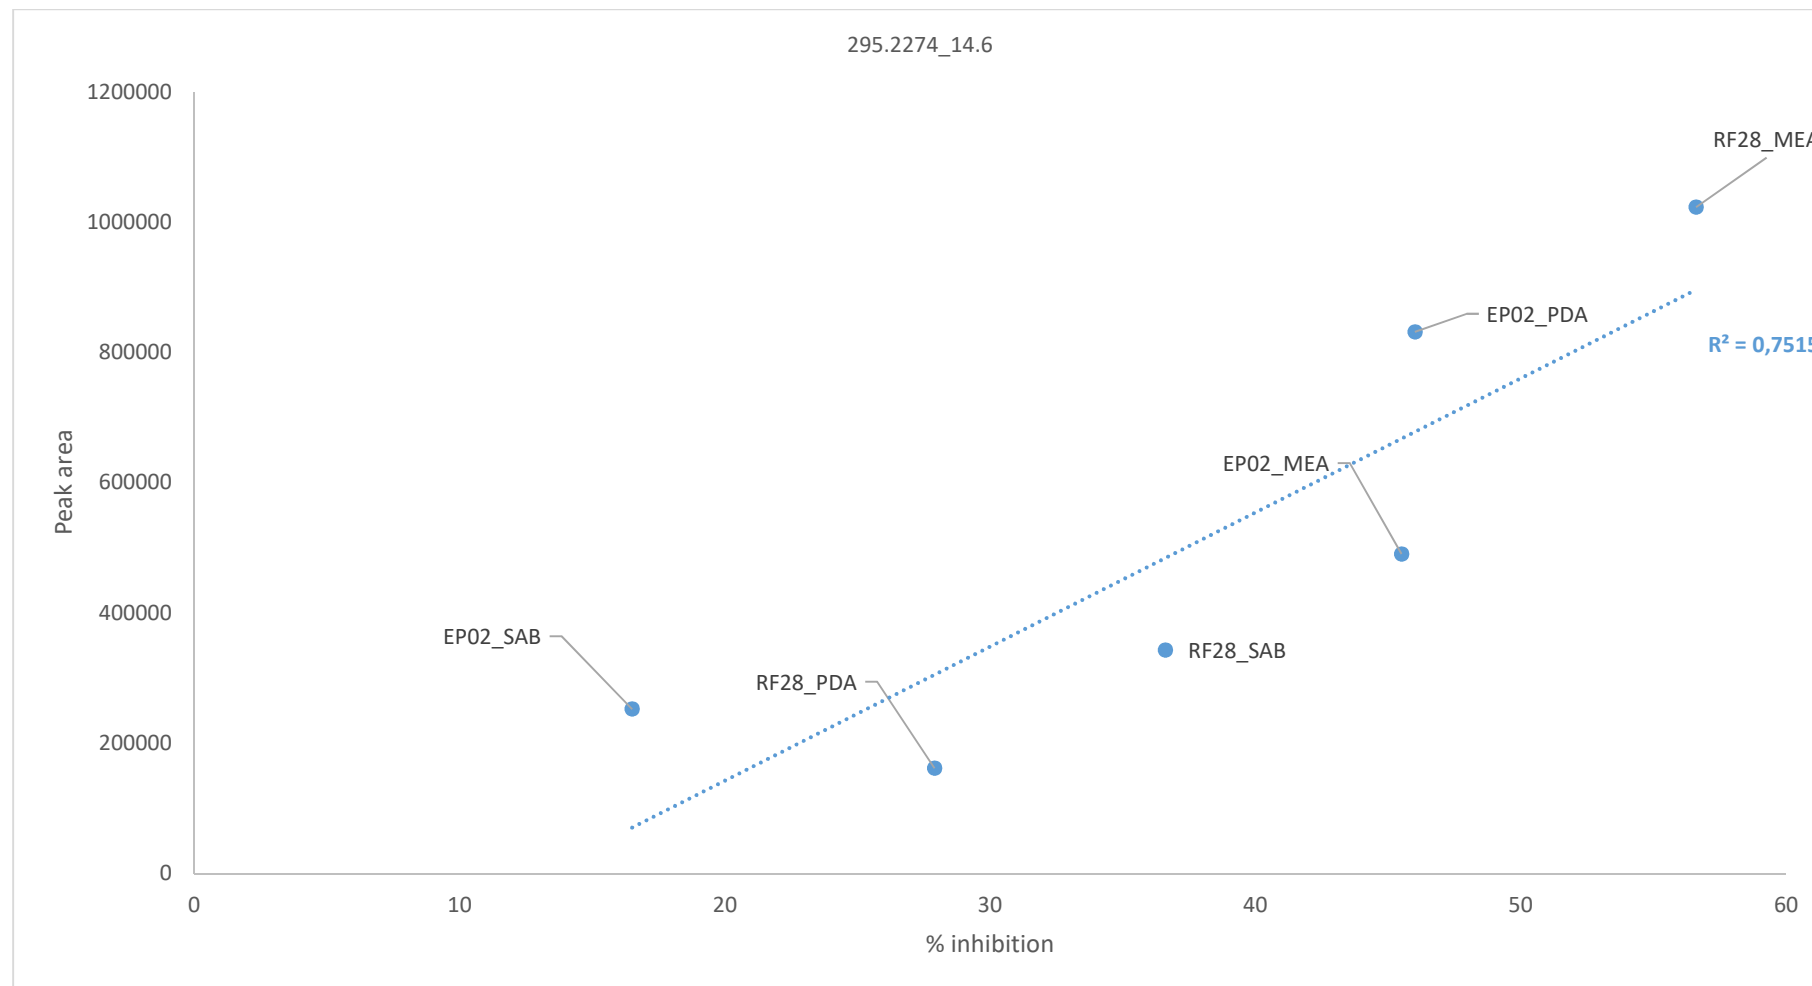

**Figure S15.** Scatter plot presenting peak areas of highlighted feature  $m/z$  2953.2111 at 14.0 min in correlation with the activity of the corresponding extracts of *Preussia* samples. Pearson correlation coefficient of the linear regression  $r^2$  is given.

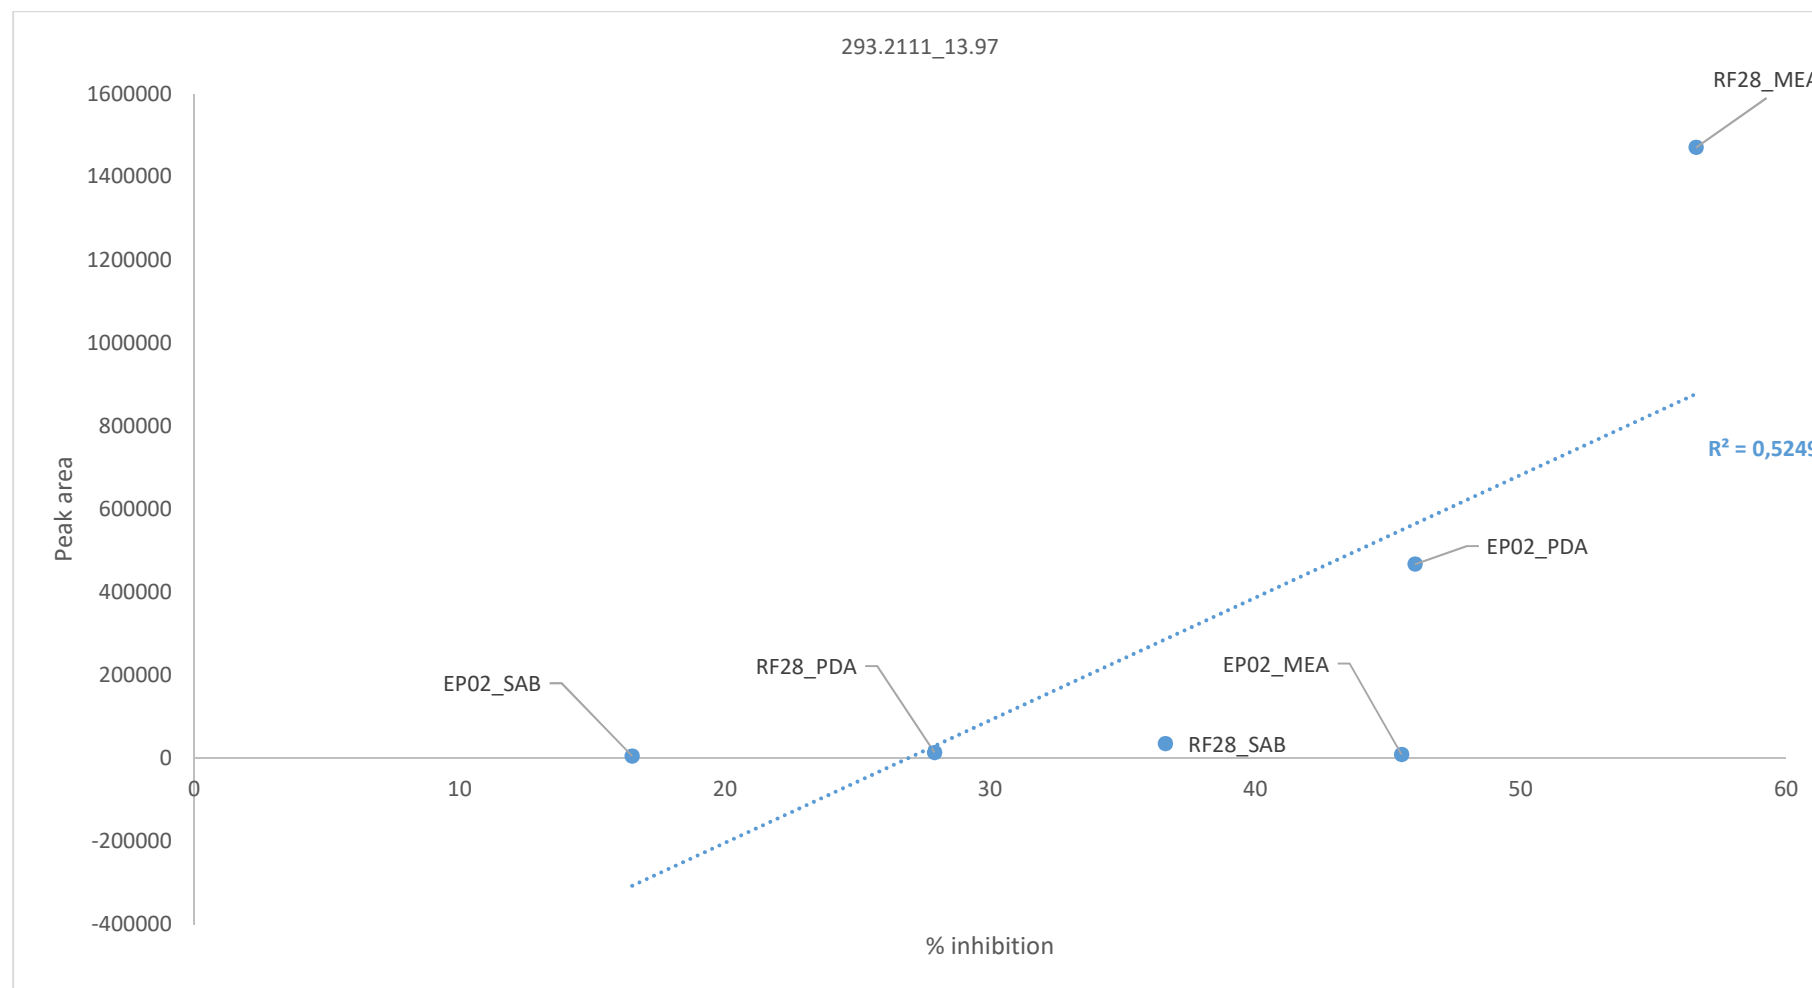

**Figure S16.** Scatter plot presenting peak areas of highlighted feature  $m/z$  591.4622 at 16.5 min in correlation with the activity of the corresponding extracts of *Preussia* samples. Pearson correlation coefficient of the linear regression  $r^2$  is given.

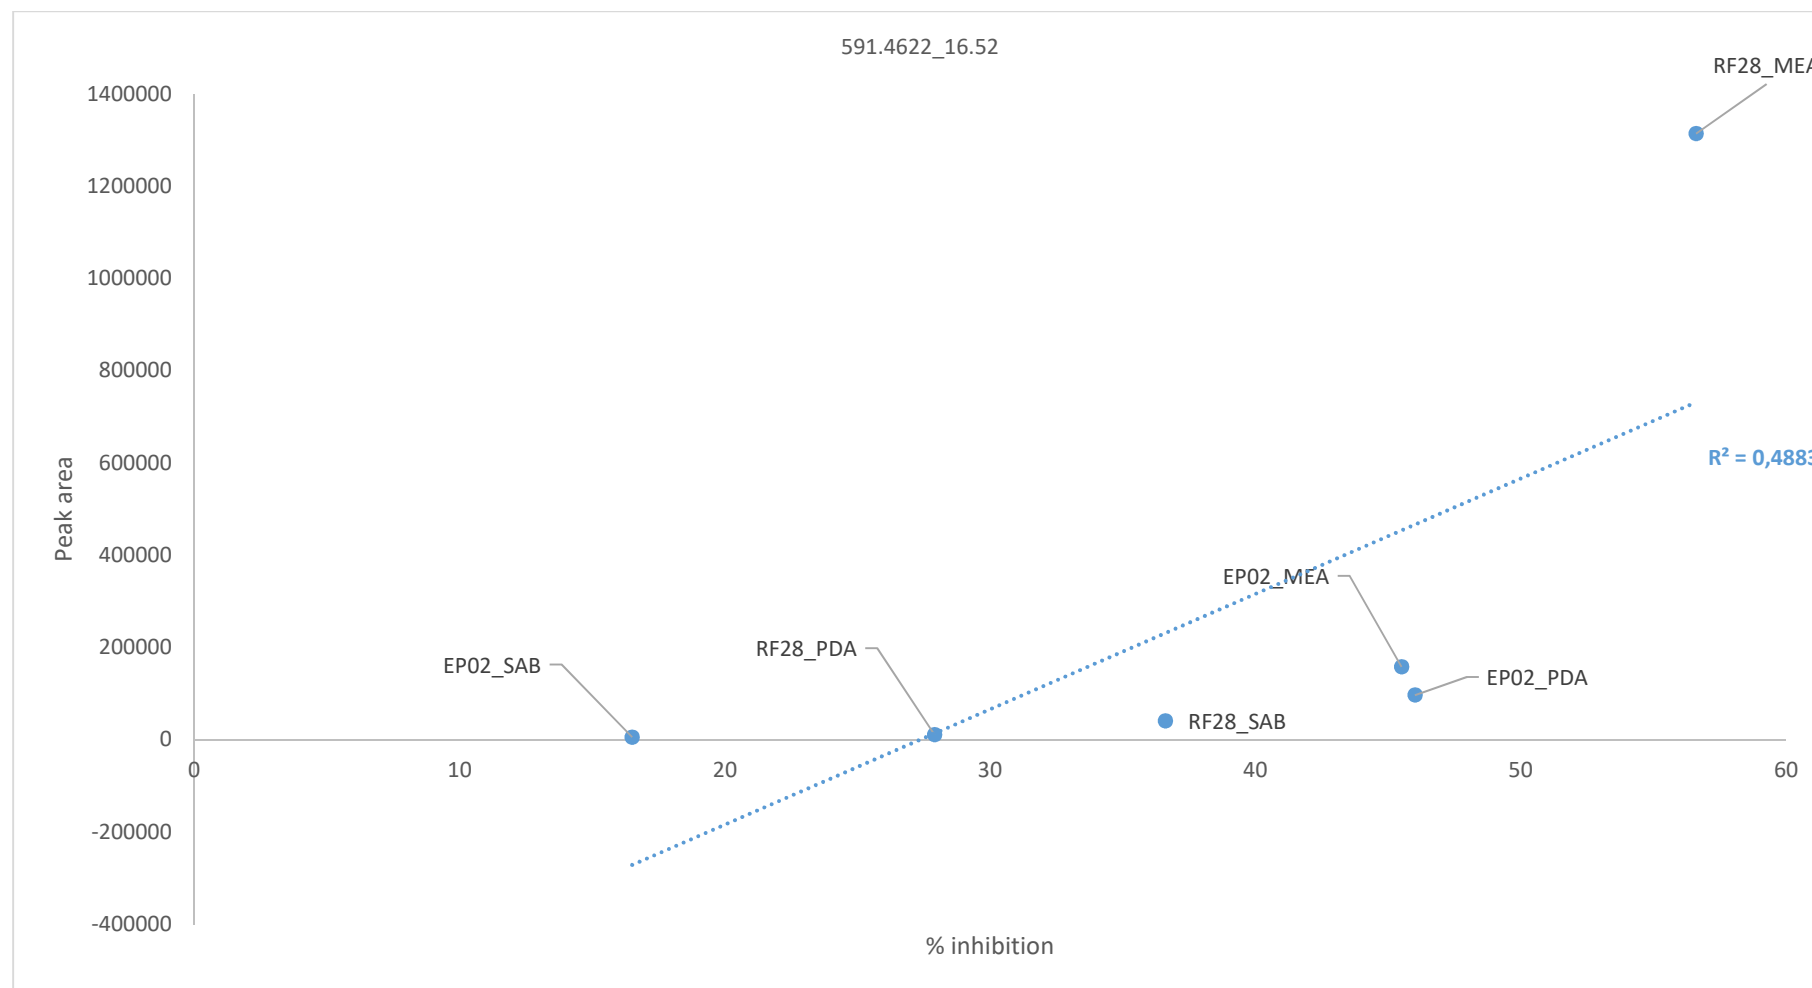

**Figure S17.** Scatter plot presenting peak areas of highlighted feature  $m/z$  298.2115 at 14.2 min in correlation with the activity of the corresponding extracts of *Preussia* samples. Pearson correlation coefficient of the linear regression  $r^2$  is given.

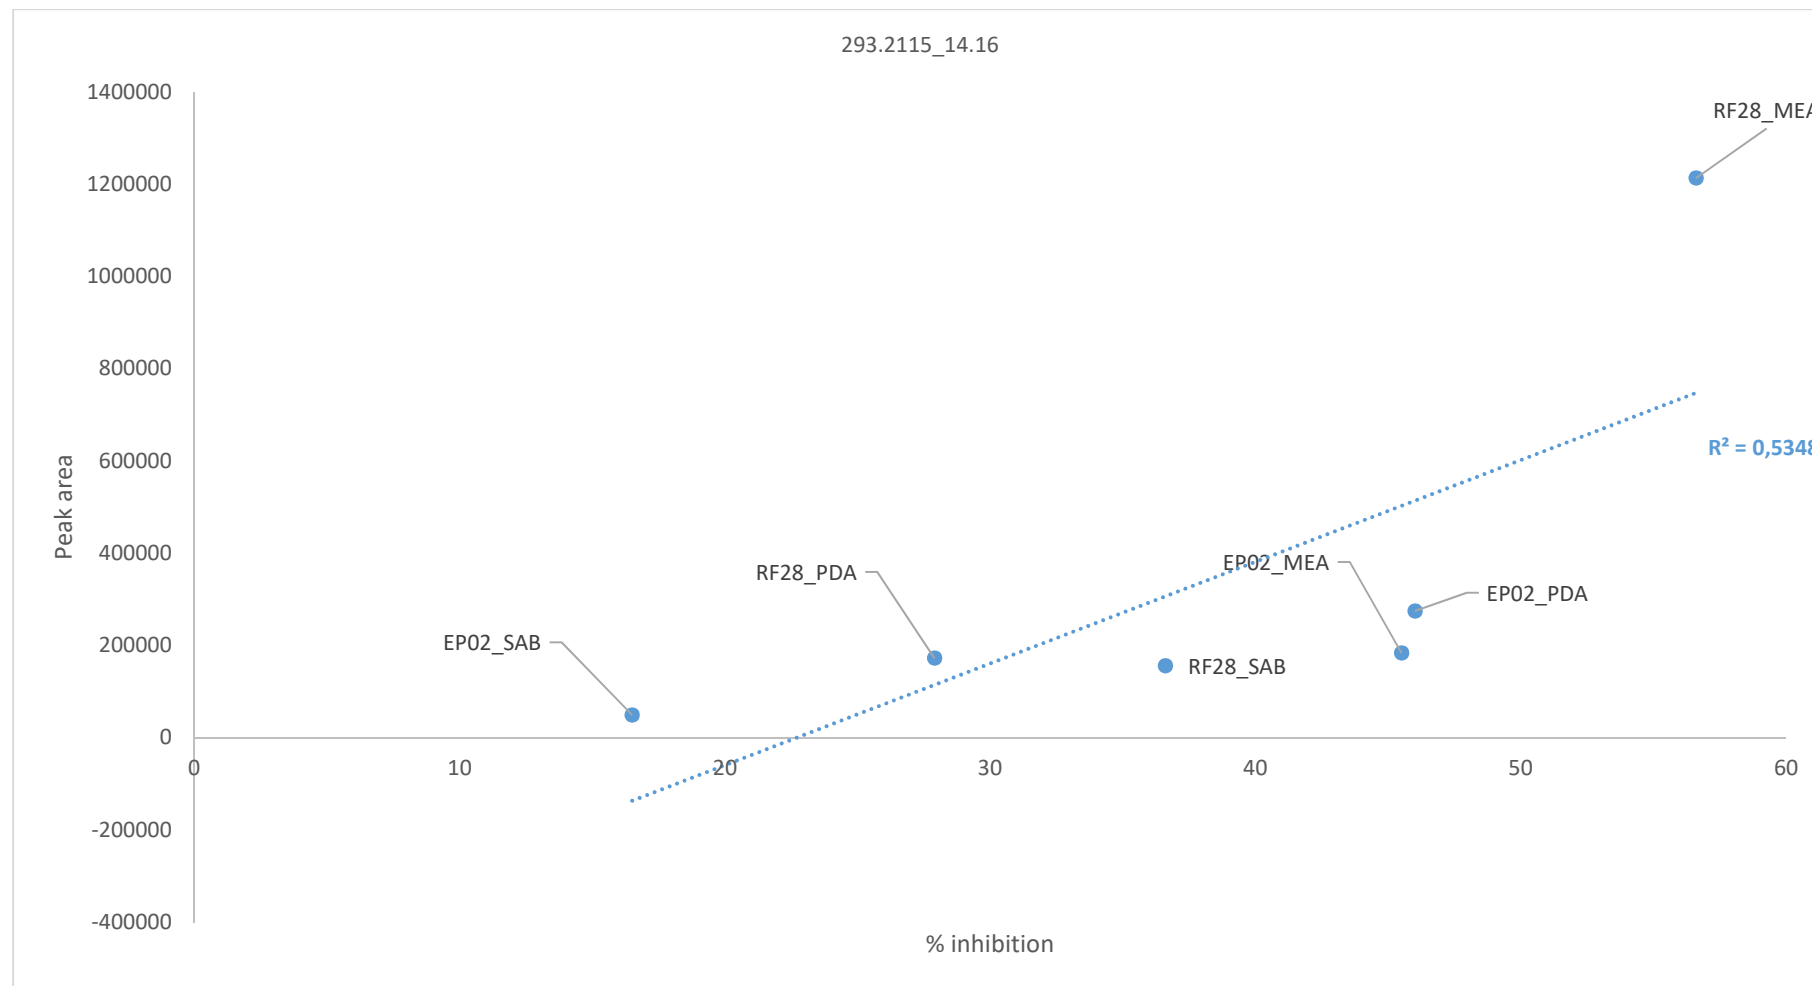

**Figure S18.** Scatter plot presenting peak areas of highlighted feature  $m/z$  307.1907 at 12.9 min in correlation with the activity of the corresponding extracts of *Preussia* samples. Pearson correlation coefficient of the linear regression  $r^2$  is given.

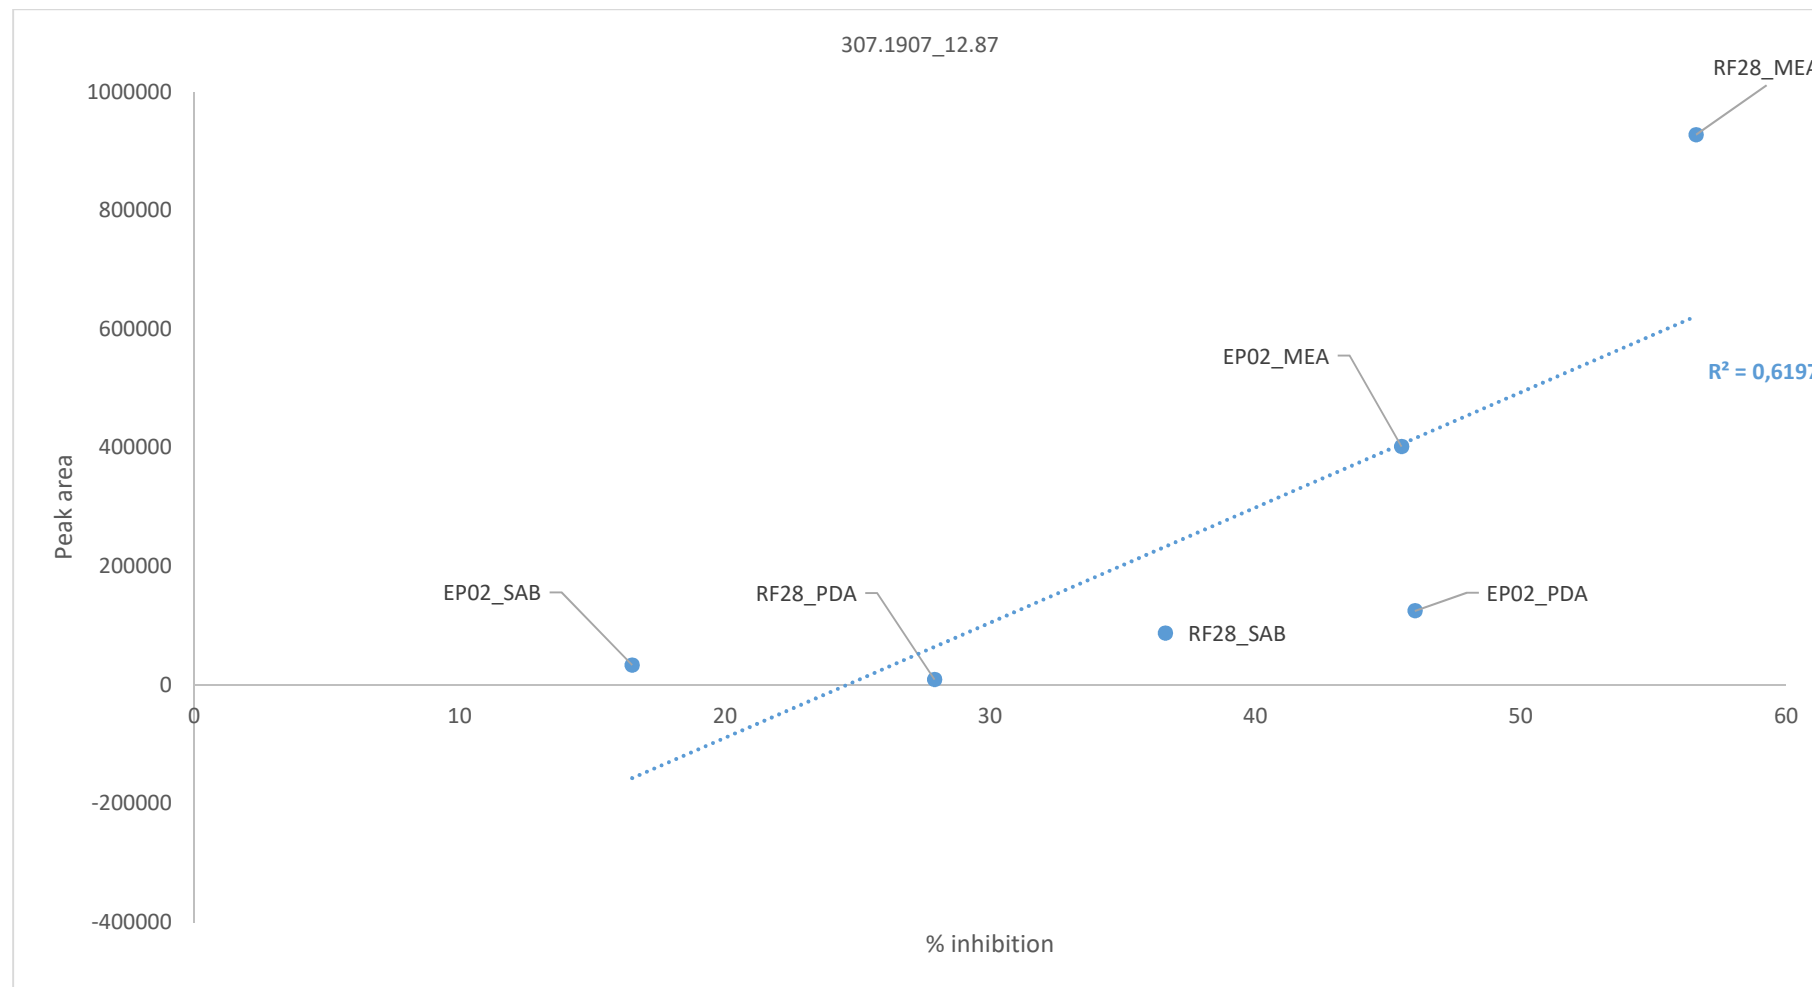

**Figure S19.** Scatter plot presenting peak areas of highlighted feature  $m/z$  311.2217 at 13.9 min in correlation with the activity of the corresponding extracts of *Preussia* samples. Pearson correlation coefficient of the linear regression  $r^2$  is given.

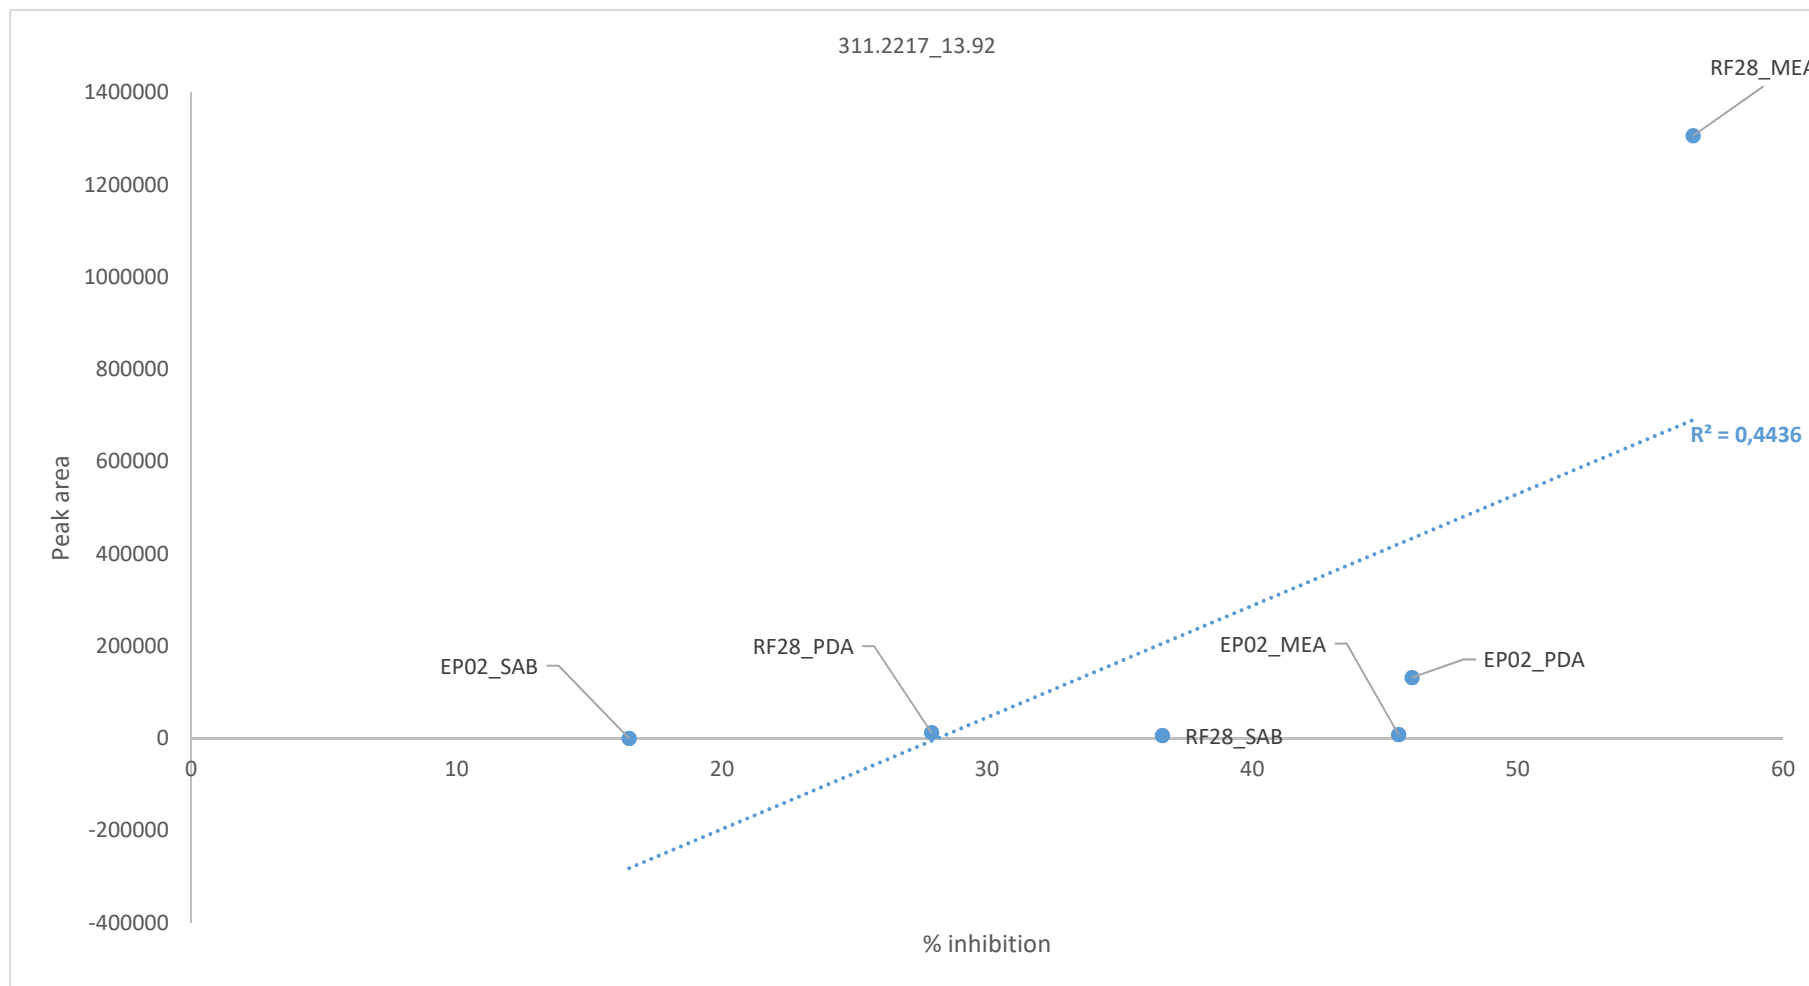

**Figure S20.** Extracted ion chromatograms for  $m/z$  311.2219 for the different extracts of *Preussia* species with cultures on MEA medium highlighted in bold.

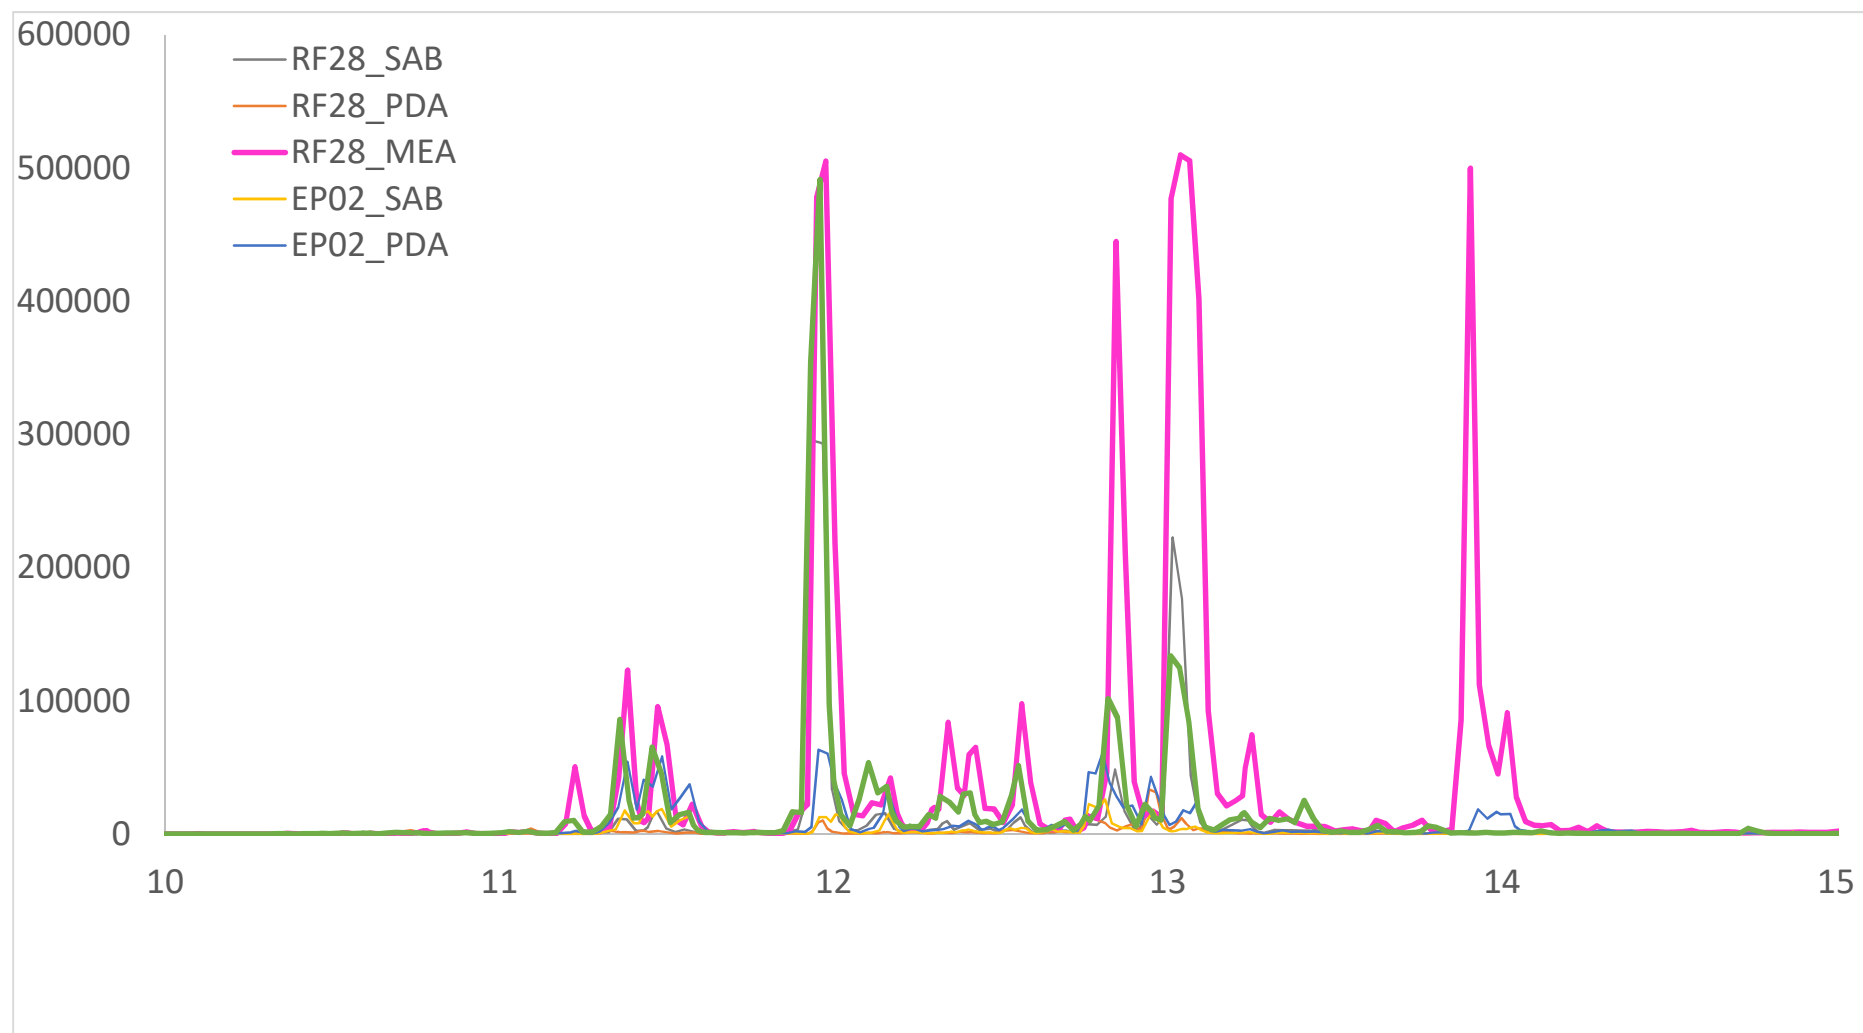



**Figure S21.** Peak area of the three major peaks for  $m/z$  311.222 in the different extracts of *Preussia* species in relation with their culture media : Sabouraud (SAB), Potato Dextrose Agar (PDA), Malt Extract Agar (MEA).

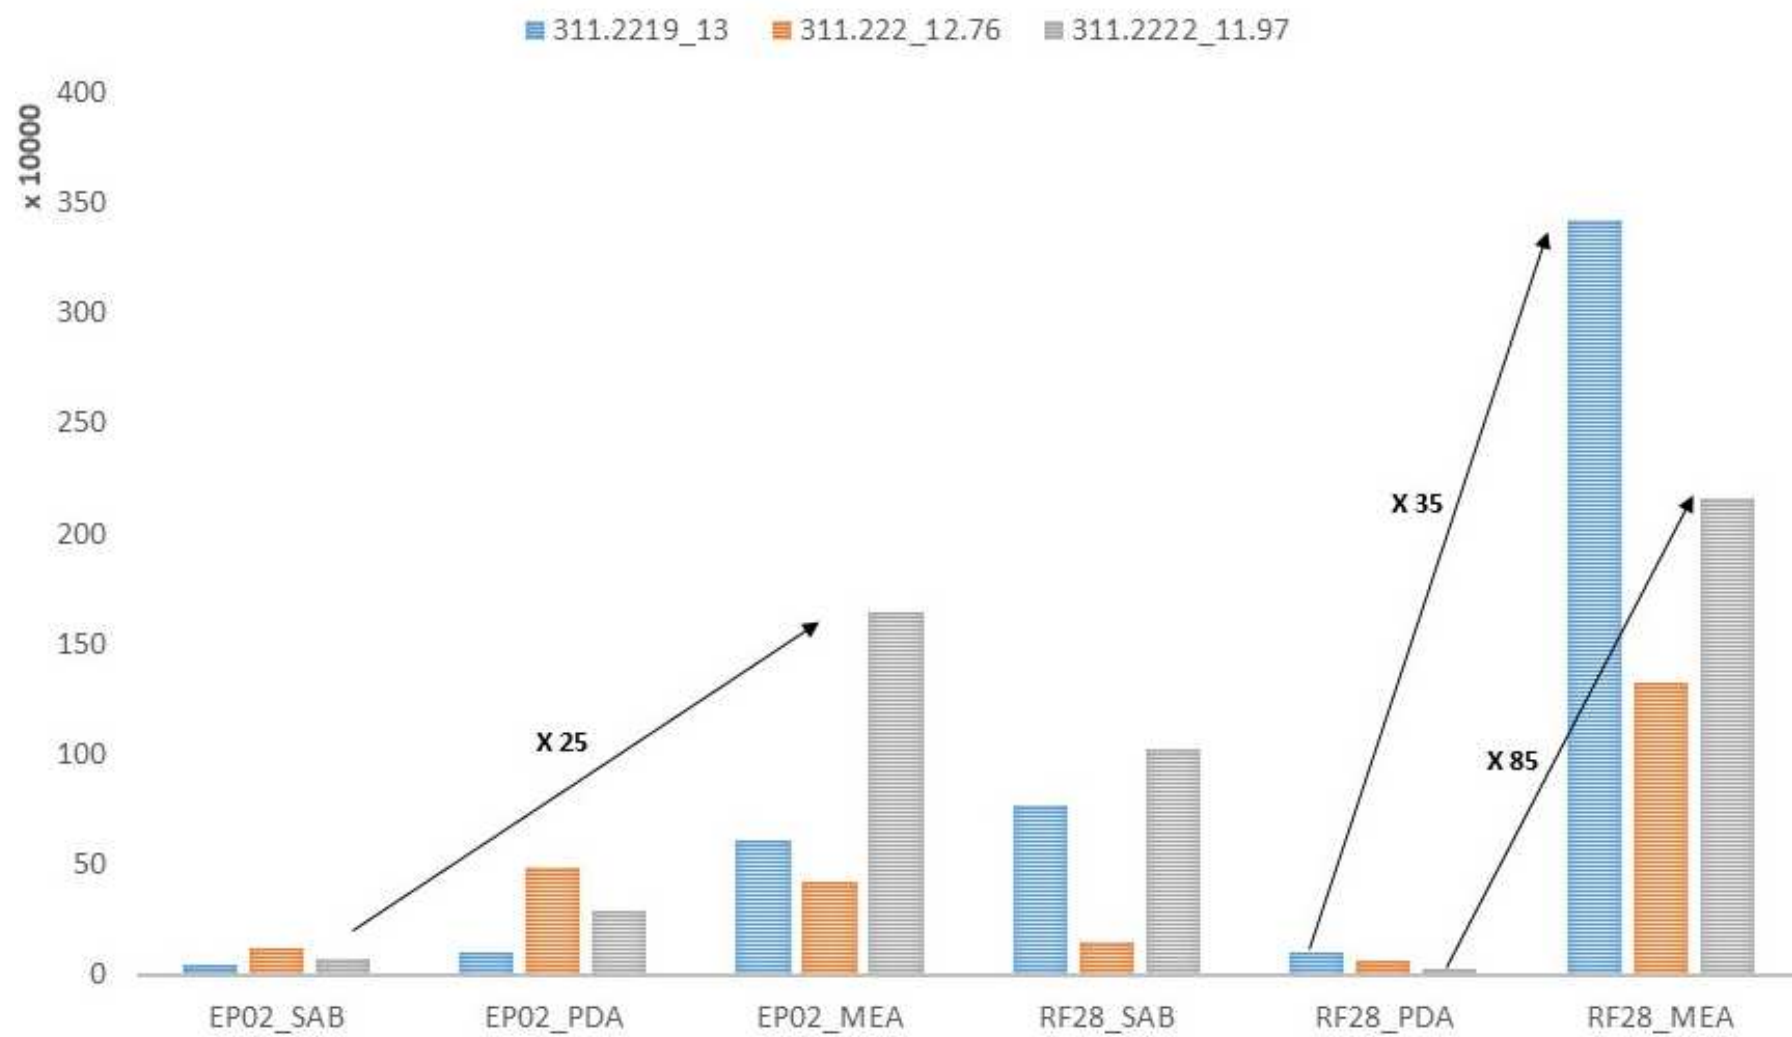

**Figure S22.**  $^1\text{H}$  NMR of compound 8Z-5,6-epoxy-4-hydroxy-octadec-8-enoic acid

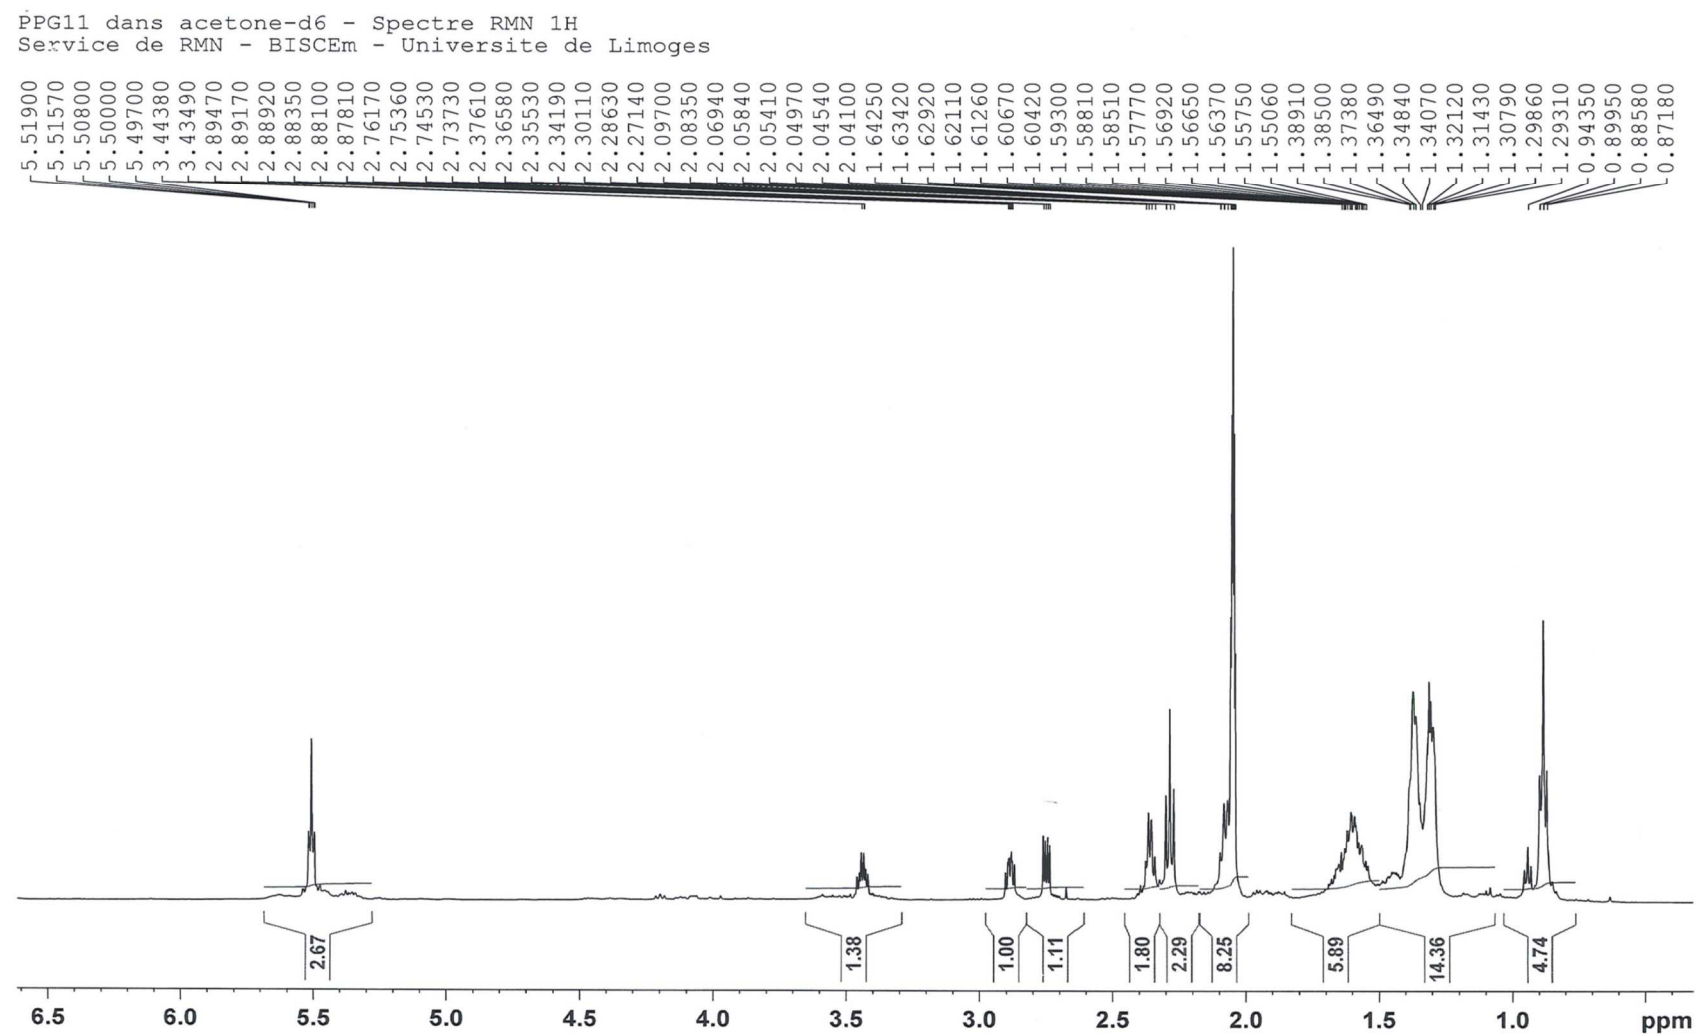

**Figure S23.**  $^{13}\text{C}$  NMR of compound 8Z-5,6-epoxy-4-hydroxy-octadec-8-enoic acid

PPG11 dans acetone-d6 - Spectre RMN  $^{13}\text{C}$   
Service de RMN - BISCEM - Université de Limoges

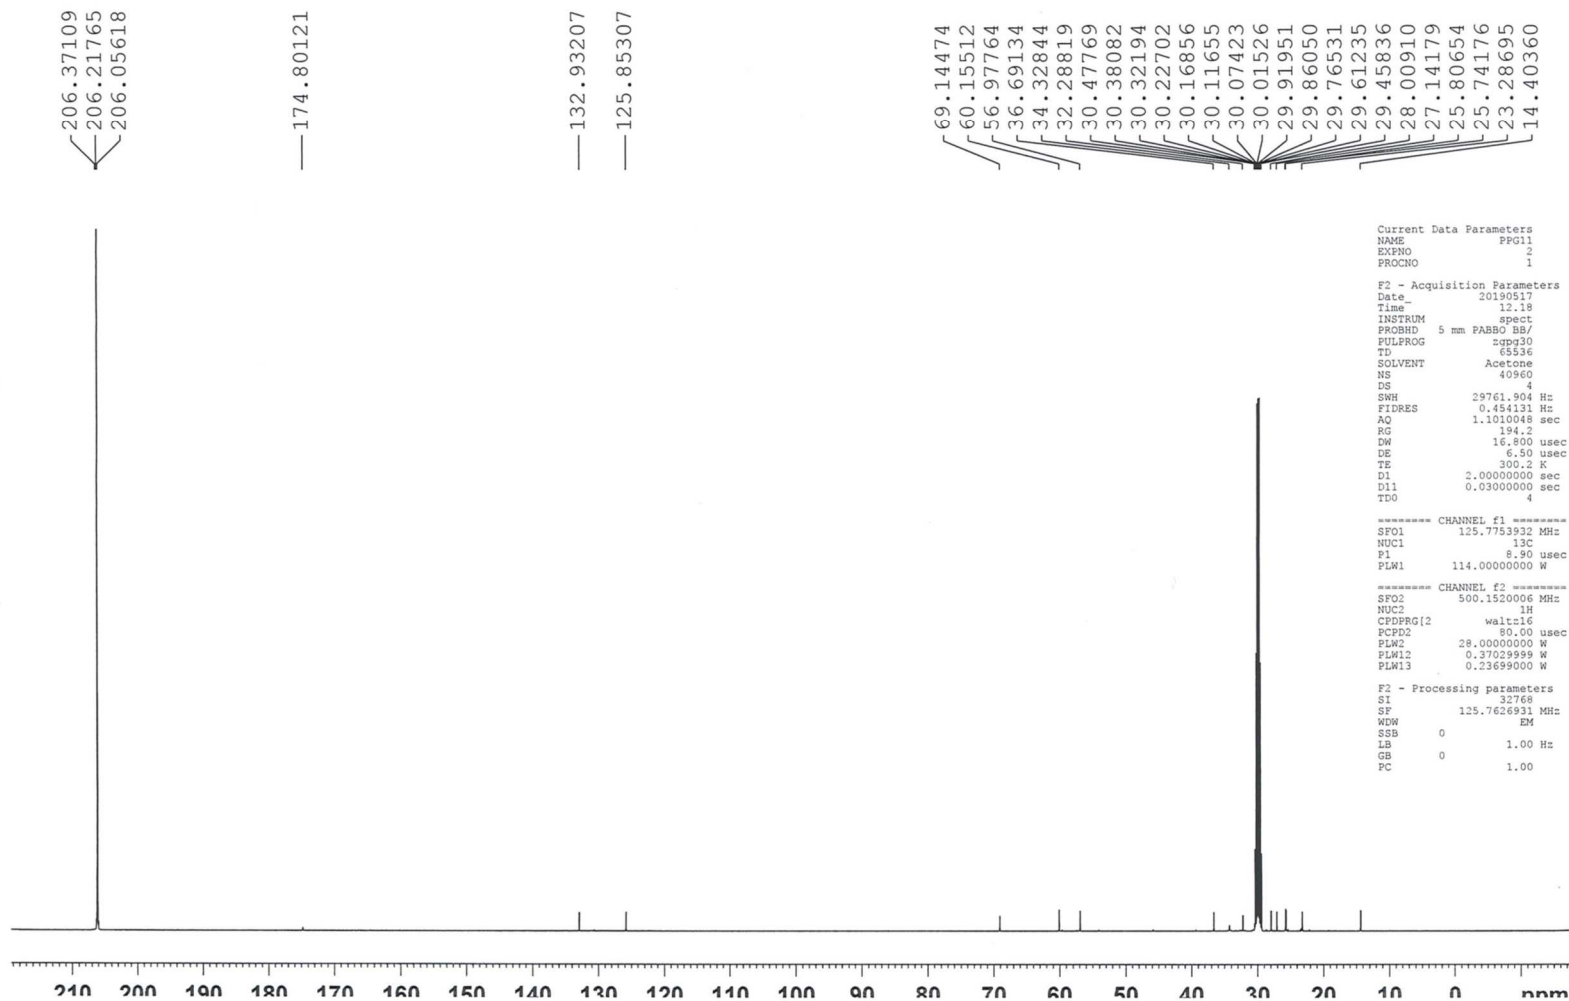

**Figure S24.**  $^{13}\text{C}$  NMR of compound 8Z-5,6-epoxy-4-hydroxy-octadec-8-enoic acid

PPG11 dans acetone-d6 - Spectre RMN 13C  
Service de RMN - BISCEM - Université de Limoges

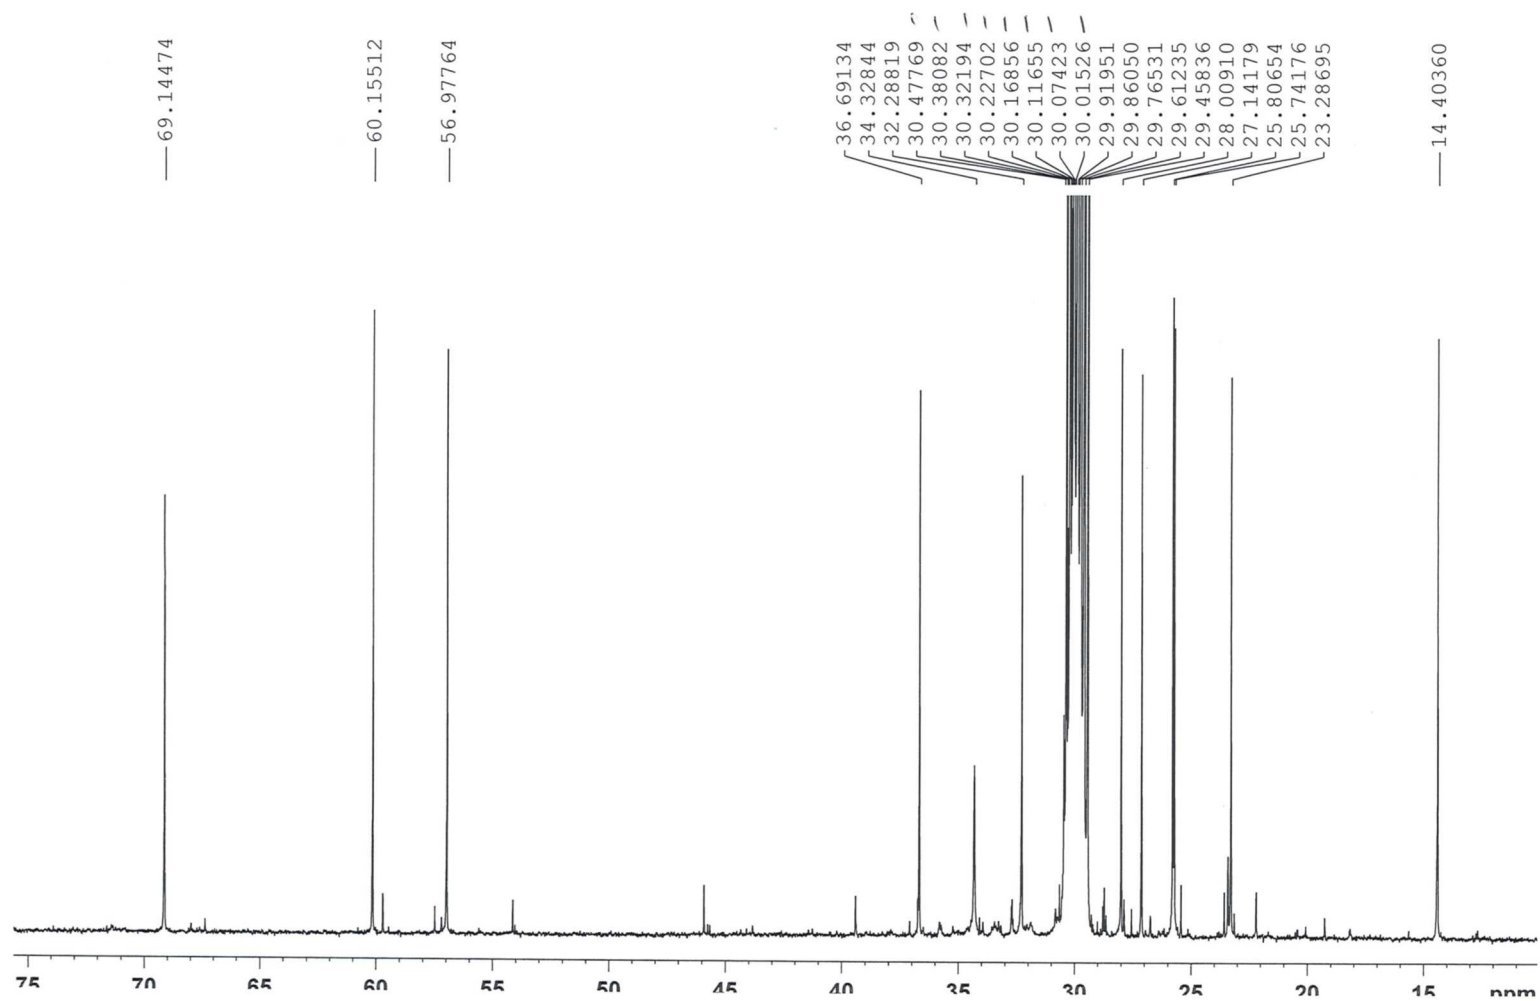

**Figure S25.** 2D NMR COSY Spectrum of compound 8Z-5,6-epoxy-4-hydroxy-octadec-8-enoic acid

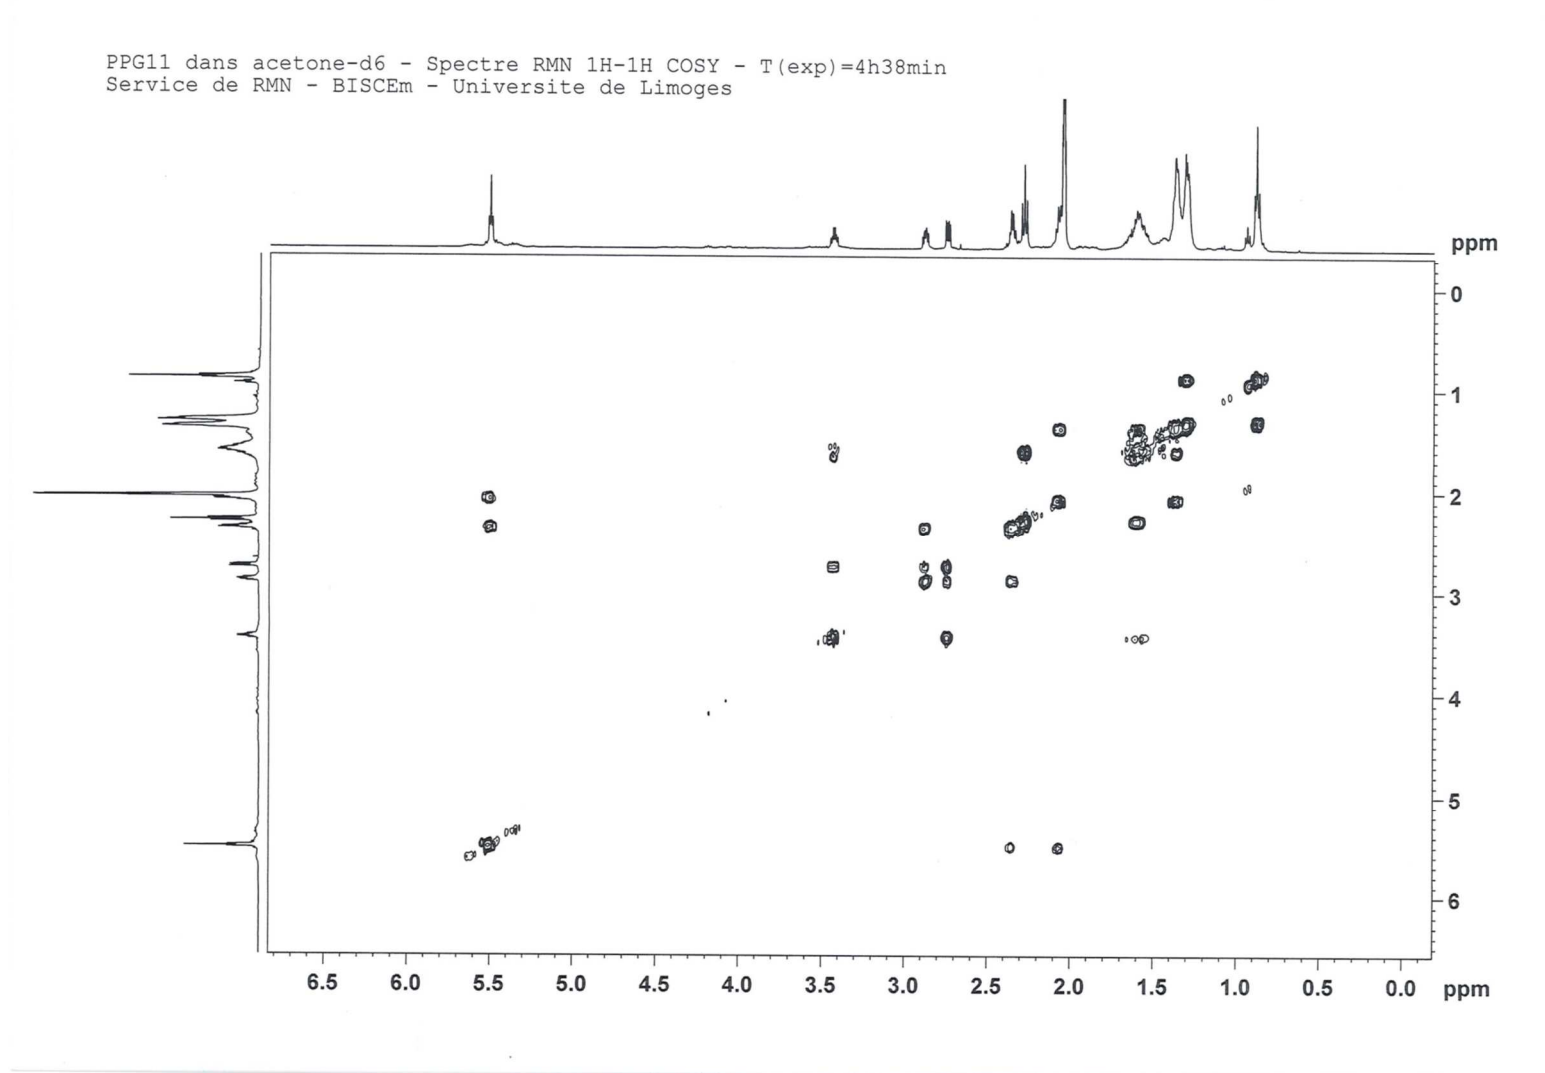

**Figure S26.** 2D NMR COSY Spectrum of compound 8Z-5,6-epoxy-4-hydroxy-octadec-8-enoic acid

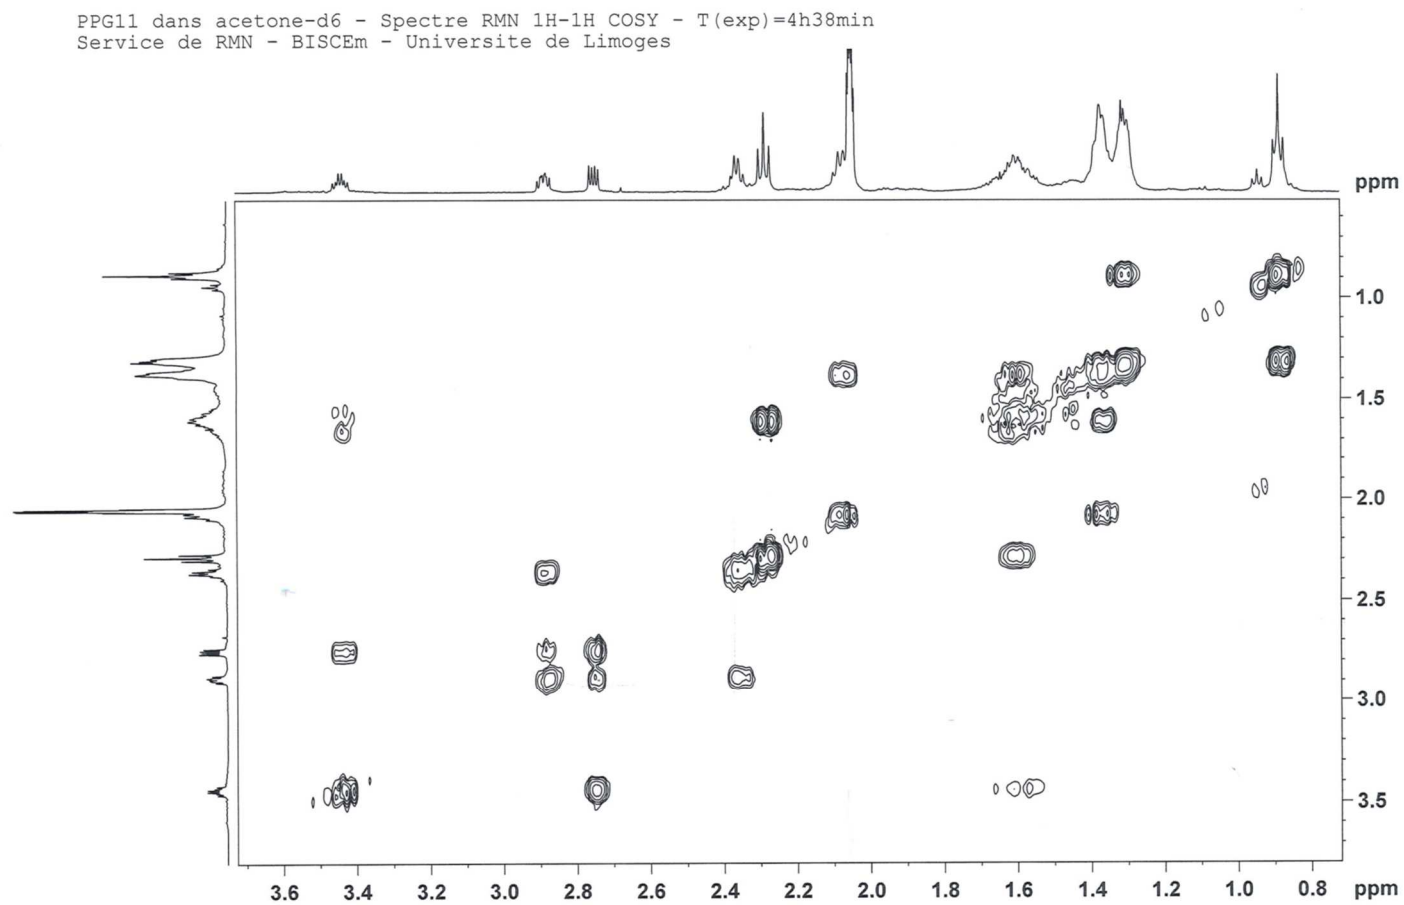

**Figure S27.** 2D NMR HSQC Spectrum of compound 8Z-5,6-epoxy-4-hydroxy-octadec-8-enoic acid

PPG11 dans acetone-d6 - Spectre RMN 1H-13C HSQC  
Service de RMN - BISCEM - Université de Limoges

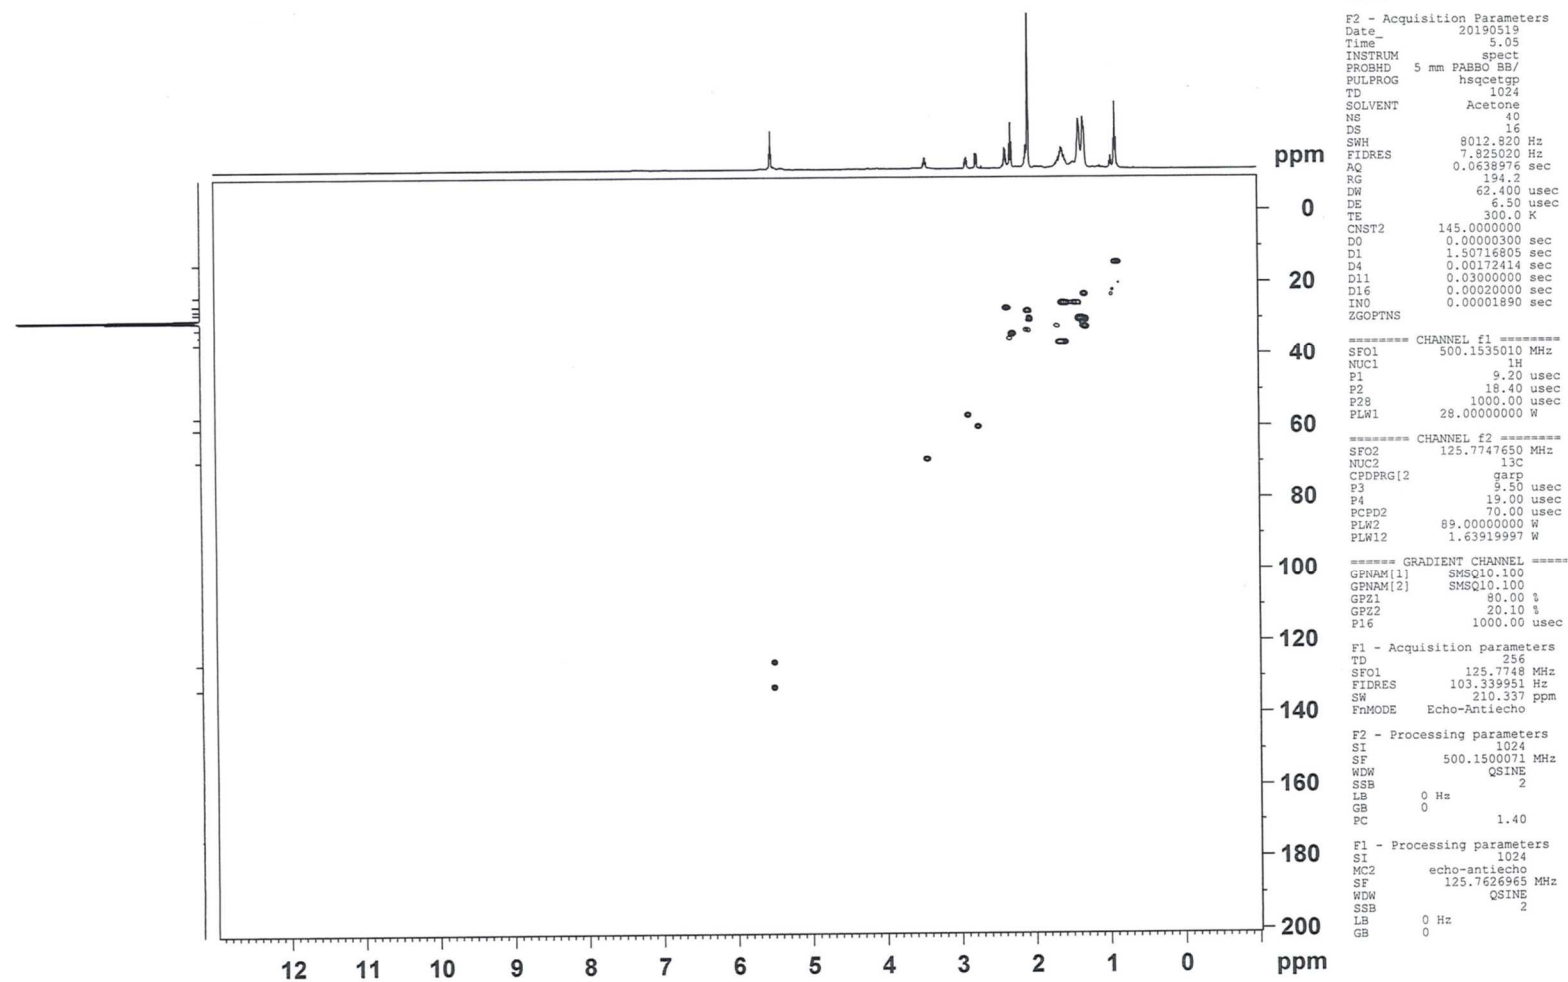



**Figure S28.** 2D NMR HSQC Spectrum of compound 8Z-5,6-epoxy-4-hydroxy-octadec-8-enoic acid

PPG11 dans acetone-d6 - Spectre RMN 1H-13C HSQC  
Service de RMN - BISCEM - Universite de Limoges

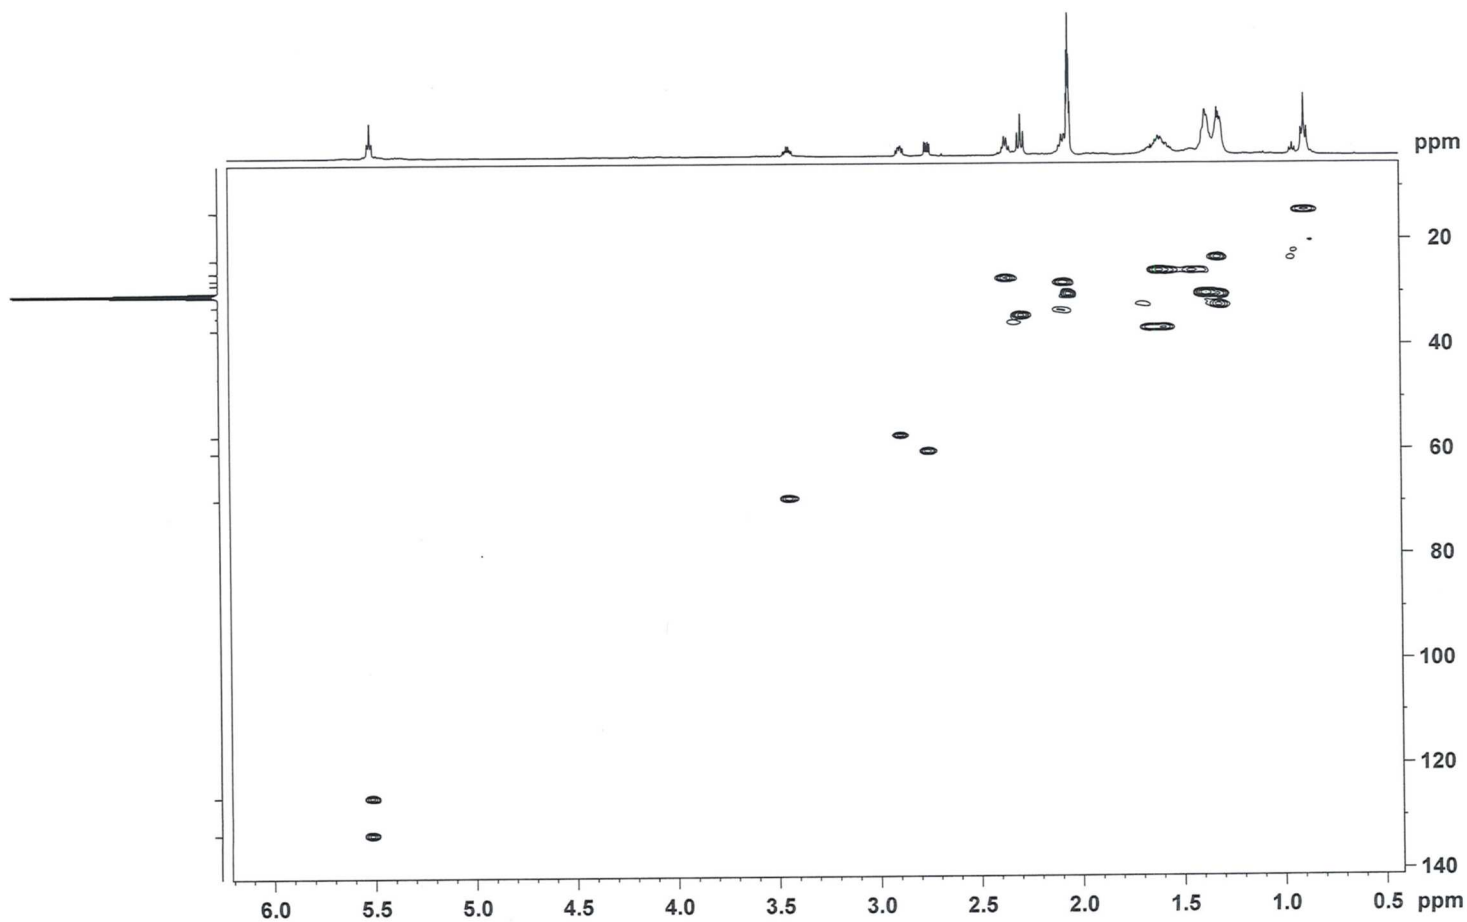

**Figure S29.** 2D NMR HMBC Spectrum of compound 8Z-5,6-epoxy-4-hydroxy-octadec-8-enoic acid

PPG11 dans acetone-d6 - Spectre RMN 1H-13C HMBC  
Service de RMN - BISCEm - Universite de Limoges

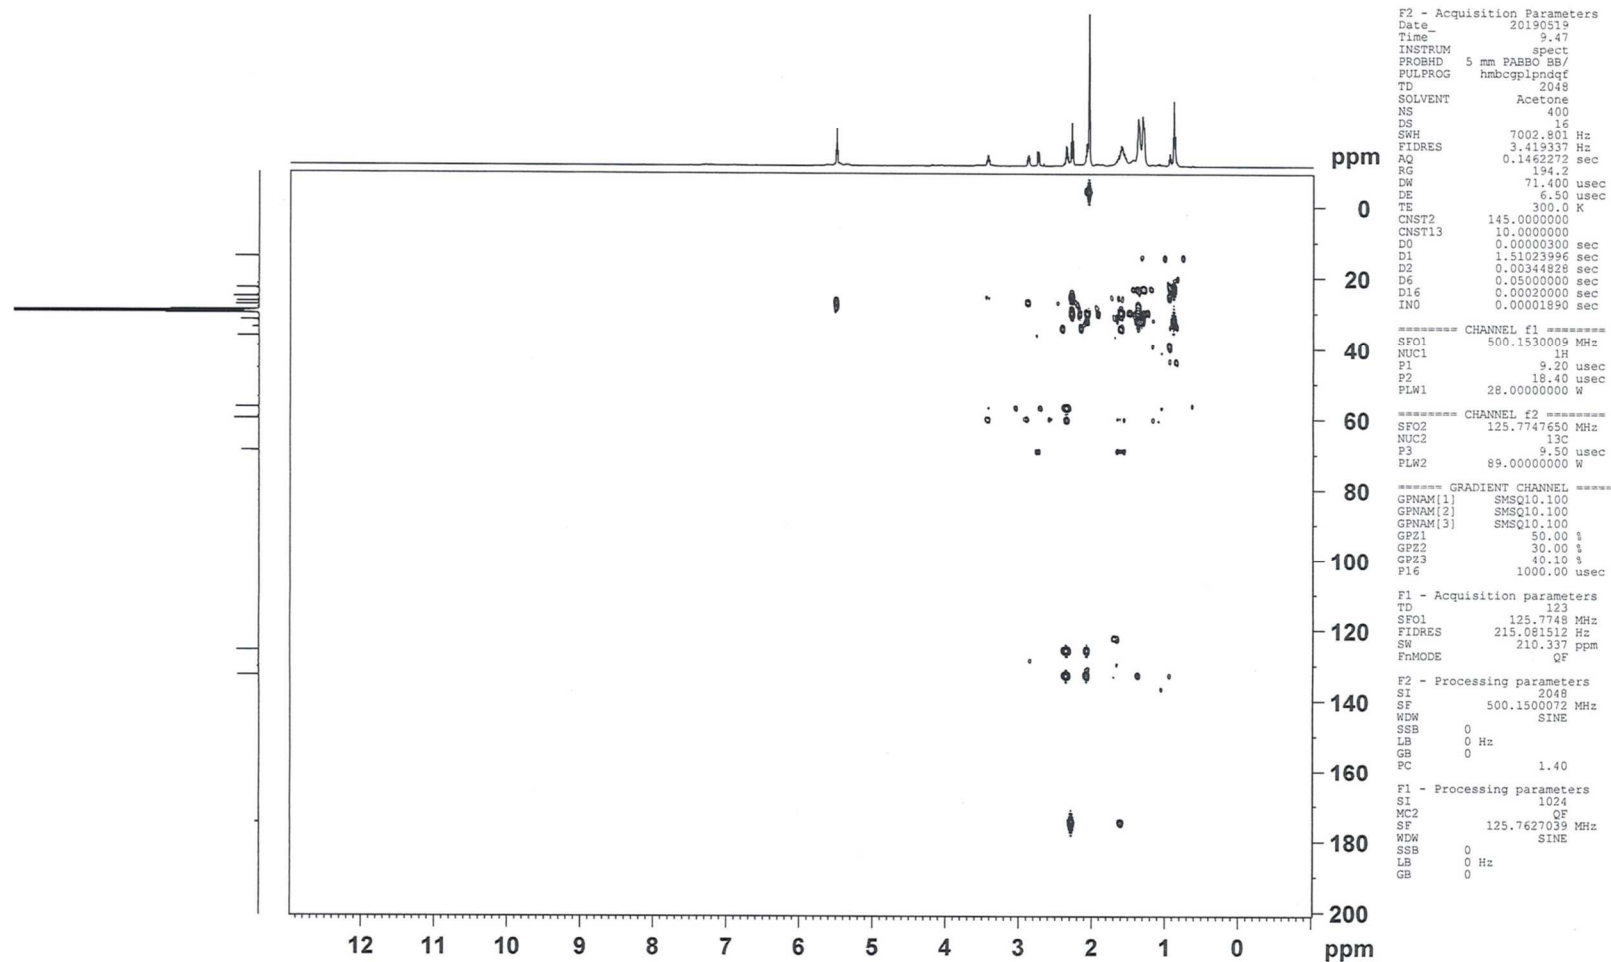

**Figure S30.** 2D NMR HMBC Spectrum of compound 8Z-5,6-epoxy-4-hydroxy-octadec-8-enoic acid

PPG11 dans acetone-d6 - Spectre RMN 1H-13C HMBC  
Service de RMN - BISCEM - Université de Limoges

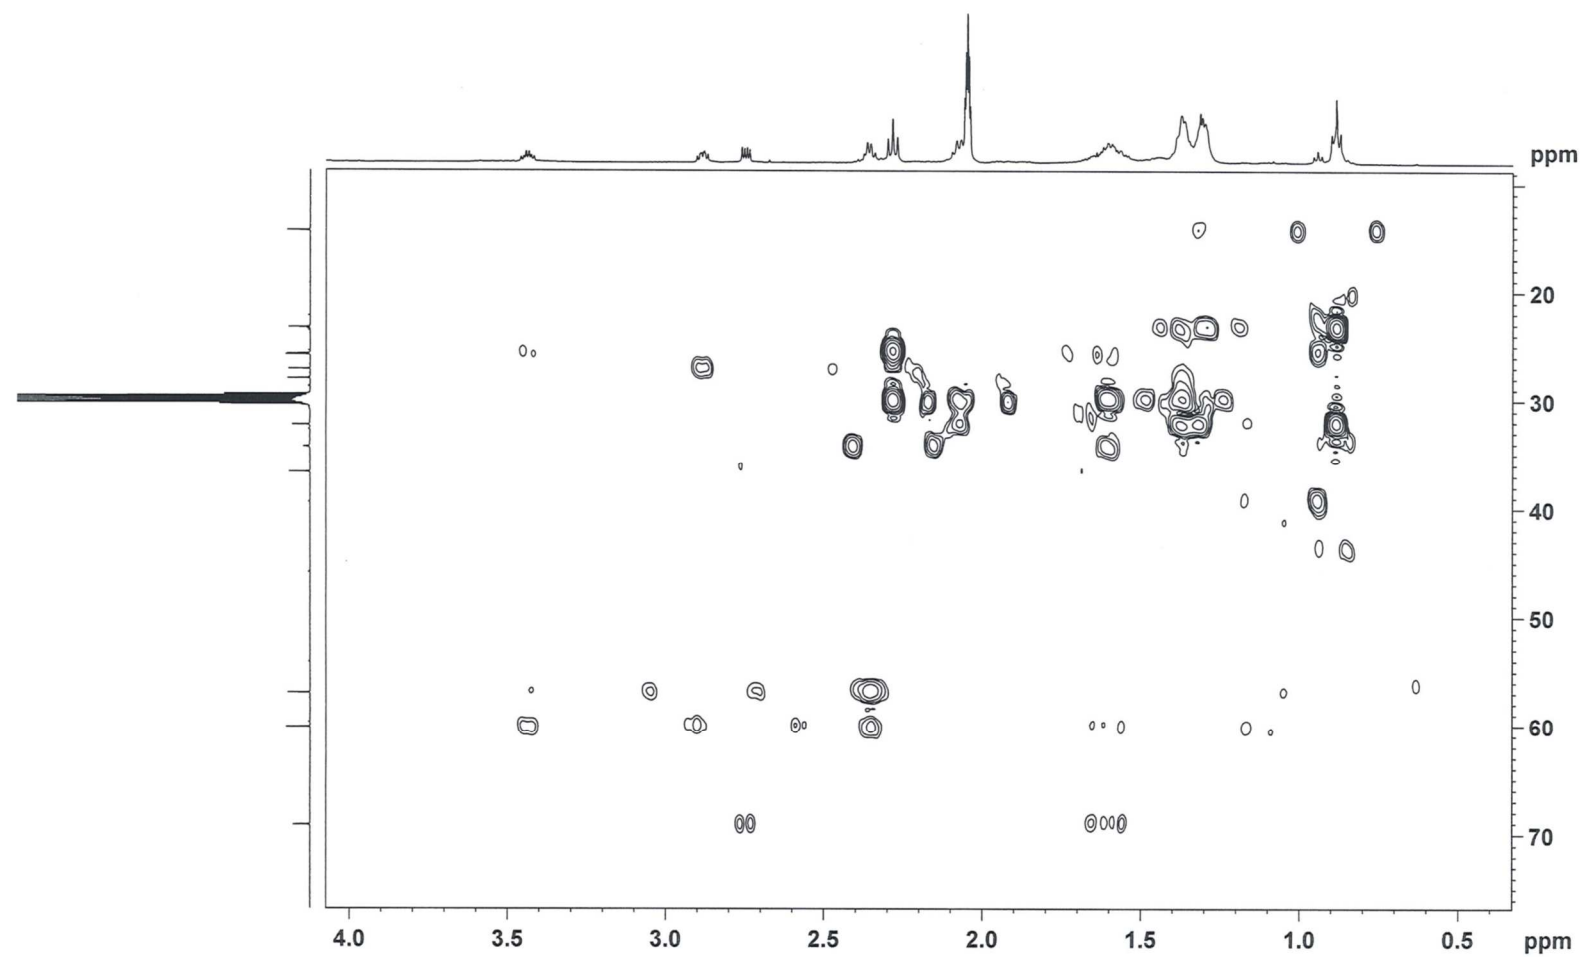

Supplement: s1 [file s1]
